# Supplementary material
Source: PubMed Central journal article supplement (PMC4000162)
Supplement: NIHMS438545-supplement-Supplementary_table_1.pdf [file NIHMS438545-supplement-Supplementary_table_1.pdf]

## Supplementary Table 1: Cyclin D1 Differentially-expressed Genes

| <u>Gene Symbol</u> | <u>D1 Fold Change</u> | <u>Gene Symbol</u> | <u>D1 Fold Change</u> |
|--------------------|-----------------------|--------------------|-----------------------|
| 0610005C13Rik      | -4.21                 | 2610002J02Rik      | 16.02                 |
| 0610010D20Rik      | -3.90                 | 2610029G23Rik      | 3.59                  |
| 0610031G08Rik      | -9.00                 | 2610034B18Rik      | 3.22                  |
| 0610033I05Rik      | 10.24                 | 2610036L11Rik      | 8.87                  |
| 0910001L09Rik      | -3.73                 | 2610039C10Rik      | 12.09                 |
| 1110001A16Rik      | -3.05                 | 2610101N10Rik      | 3.44                  |
| 1110001J03Rik      | -3.35                 | 2610208M17Rik      | 9.28                  |
| 1110005A03Rik      | -3.07                 | 2610305J24Rik ///  | 54.05                 |
| 1110014K08Rik ///  | 3.35                  | 2610305J24Rik ///  | 7.56                  |
| 1110018J18Rik      | -3.46                 | 2610510H03Rik      | 3.57                  |
| 1110034A24Rik      | 4.03                  | 2700007P21Rik      | 3.88                  |
| 1110038B12Rik      | 3.53                  | 2700029M09Rik      | 4.05                  |
| 1110067D22Rik      | 4.73                  | 2700038C09Rik      | -3.01                 |
| 1200006F02Rik      | -8.46                 | 2700094F01Rik      | 4.48                  |
| 1200013P24Rik      | -3.59                 | 2700094K13Rik      | 3.10                  |
| 1200016E24Rik      | 7.06                  | 2810007J24Rik      | -24.31                |
| 1300010F03Rik      | -3.56                 | 2810022L02Rik      | 6.67                  |
| 1300013J15Rik      | -6.28                 | 2810026P18Rik      | 3.46                  |
| 1300018J18Rik      | -4.03                 | 2810405K02Rik      | -7.10                 |
| 1700007B13Rik      | -3.17                 | 2810408I11Rik      | 3.22                  |
| 1700017B05Rik ///  | 5.67                  | 2810417H13Rik      | 27.54                 |
| 1700029F09Rik      | 3.47                  | 2810433K01Rik      | 4.17                  |
| 1810013L24Rik      | -3.01                 | 2810439F02Rik      | -13.81                |
| 1810015C04Rik      | 3.13                  | 2810452K22Rik ///  | 4.21                  |
| 1810023F06Rik      | 36.03                 | 2810474O19Rik      | 12.02                 |
| 1810049H13Rik      | -3.12                 | 2900019G14Rik      | -3.15                 |
| 1810073N04Rik      | 3.10                  | 2900092E17Rik      | 3.93                  |
| 2010003O02Rik      | -4.58                 | 3110003A17Rik      | 6.38                  |
| 2010109K11Rik      | 4.17                  | 3110043O21Rik      | 4.46                  |
| 2010111I01Rik      | 4.72                  | 3110048E14Rik      | 6.55                  |
| 2010305C02Rik      | -3.93                 | 3110049J23Rik      | -5.49                 |
| 2310005L22Rik      | 3.69                  | 3200002M19Rik      | 3.61                  |
| 2310007H09Rik      | -4.35                 | 3300001M20Rik      | 3.03                  |
| 2310009E04Rik      | -4.95                 | 3930401B19Rik ///  | 4.00                  |
| 2310016C08Rik      | 6.71                  | 4632419I22Rik      | 4.85                  |
| 2310057M21Rik      | 3.26                  | 4632419K20Rik      | 4.63                  |
| 2310076L09Rik      | -4.51                 | 4632434I11Rik      | 16.77                 |
| 2400003C14Rik      | 3.33                  | 4732466D17Rik      | -3.42                 |
| 2410006H16Rik      | 3.57                  | 4732495E13Rik      | 3.00                  |
| 2500001K11Rik      | 6.08                  | 4833427B12Rik      | 9.39                  |
| 2510012J08Rik      | 4.24                  | 4833442J19Rik      | -3.04                 |
| 2610002J02Rik      | 16.02                 | 4930570C03Rik      | 3.82                  |

## Supplementary Table 1: Cyclin D1 Differentially-expressed Genes

| Gene Symbol       | D1 Fold Change | Gene Symbol      | D1 Fold Change |
|-------------------|----------------|------------------|----------------|
| 4930579G24Rik     | 13.85          | Acaa1b           | -9.33          |
| 4933403F05Rik     | -3.69          | Acaa2            | -3.01          |
| 4933405A16Rik     | 3.68           | Acacb            | -3.86          |
| 4933425L03Rik     | 3.02           | Acads            | -4.24          |
| 5033413D16Rik     | 8.42           | Acadsb           | -3.33          |
| 5033414D02Rik     | 4.06           | Acbd3            | 3.07           |
| 5530402H23Rik     | -3.74          | Acot1            | -5.02          |
| 5730593N15Rik     | -3.48          | Acot1 /// Acot2  | -6.29          |
| 5830411G16Rik     | -17.27         | Acot3            | -3.05          |
| 5830433M19Rik     | 5.85           | Acot9            | 21.70          |
| 5830443L24Rik     | 4.08           | Acot9 /// Acot10 | 20.78          |
| 5830457O10Rik     | 3.94           | Acpl2            | 10.68          |
| 5930416I19Rik     | 3.13           | Acs11            | -12.72         |
| 6030490B17Rik     | -4.10          | Acsm3            | -8.75          |
| 6230416J20Rik     | 4.85           | Acss2            | -5.41          |
| 6330503K22Rik     | 12.73          | Actb             | 3.04           |
| 8430408G22Rik     | -5.35          | Ada              | 5.45           |
| 8430410A17Rik     | 3.12           | Adamdec1         | -3.62          |
| 9030618K22Rik     | -10.66         | Adamts1          | 3.06           |
| 9130409I23Rik     | -15.74         | Adcy6            | 3.14           |
| 9330120H11Rik     | -4.46          | Add1             | 3.23           |
| 9530008L14Rik     | -3.04          | Adhfe1           | -5.17          |
| 9530058B02Rik     | -4.28          | Adora1           | 5.33           |
| 9630013D21Rik     | -3.40          | Adprhl2          | 3.26           |
| 9830115L13Rik     | 3.07           | Adrbk1           | 3.01           |
| A130040M12Rik     | 4.69           | AF397014         | -3.69          |
| A230097K15Rik     | 3.07           | Afm              | -4.61          |
| A2m /// LOC677369 | 25.80          | Afmid            | -11.66         |
| A830080D01Rik     | 4.02           | Afp              | 34.09          |
| AA536743          | 8.41           | Agpat3           | -4.14          |
| Aaas              | 6.37           | Agxt             | -4.46          |
| Aacs              | -7.70          | Agxt211          | -26.20         |
| Aadat             | -5.64          | AI317395         | -5.37          |
| Abat              | -6.04          | AI451557         | 4.00           |
| Abca8a            | -11.27         | AI461788         | 9.54           |
| Abcb4             | -4.16          | AI481105         | 3.08           |
| Abcg5             | -11.74         | AI506816         | 7.80           |
| Abcg8             | -4.22          | AI597468         | 3.20           |
| Abhd6             | -3.15          | AI852444         | 3.71           |
| Ablim3            | -3.50          | Ak311            | -4.56          |
| Acaa1a            | -3.22          | Ak7              | 4.06           |
| Acaa1a /// Acaa1b | -4.17          | Akap2            | 3.77           |

## Supplementary Table 1: Cyclin D1 Differentially-expressed Genes

| Gene Symbol          | D1 Fold Change | Gene Symbol   | D1 Fold Change |
|----------------------|----------------|---------------|----------------|
| Akr1b3               | 10.82          | Arid5b        | -3.22          |
| Akr1b3 /// LOC235852 | 3.19           | Arih1         | 3.04           |
| Akr1c14              | -5.60          | Arl6          | 3.16           |
| Akr1c19              | -14.49         | Arl6ip6       | 3.57           |
| Akr1c20              | -4.32          | Armxc3        | 4.32           |
| Akr1d1               | -12.00         | Arpc1b        | 5.31           |
| Alas1                | -5.81          | Ars2          | 4.50           |
| Alas2                | -3.08          | Arsg          | 4.83           |
| Alcam                | 4.51           | Ascc3l1       | 3.27           |
| Aldh18a1             | 8.78           | Asf1a         | 3.35           |
| Aldh2                | -3.49          | Asf1b         | 7.73           |
| Aldh3a2              | -5.93          | Ash2l         | 4.46           |
| Aldh4a1              | -8.42          | Asl           | -4.97          |
| Aldh5a1              | -5.65          | Asns          | 13.52          |
| Aldoc                | -6.74          | Aspa          | -5.67          |
| Anapc4               | 4.38           | Aspm          | 3.32           |
| Anapc7               | 3.69           | Asxl1         | 4.58           |
| Ankfy1               | 3.38           | Atad2         | 15.47          |
| Ankrd17              | 4.11           | Atbf1         | -5.01          |
| Ankrd32              | 3.13           | Atf2          | 3.64           |
| Ankrd49              | 3.77           | Atf7ip        | 6.84           |
| Ankrd56              | 5.74           | Atp11a        | 8.23           |
| Ankrd57              | 4.58           | Atxn2         | 3.27           |
| Anln                 | 15.17          | AU018778      | -36.26         |
| Anp32b               | 3.27           | Auh           | -5.11          |
| Anxa1                | 3.43           | Aurka         | 11.59          |
| Anxa2                | 25.87          | Aurkb         | 4.01           |
| Aof2                 | 3.01           | AV009015      | -9.53          |
| Aox3                 | -13.75         | AV025504      | -3.10          |
| Ap1s1                | 3.38           | AW111846      | 11.12          |
| Apaf1                | 3.50           | AW555464      | 5.23           |
| Aph1a                | -3.76          | B230120H23Rik | 4.52           |
| Apol3 /// LOC672691  | -3.87          | B230308N11Rik | 3.80           |
| Appbp2               | 3.13           | B830008H07Rik | -3.77          |
| Aqp11                | -10.38         | Bak1          | 5.70           |
| Aqp4                 | -5.54          | Basp1         | 4.17           |
| Aqp8                 | 6.43           | Bat1a         | 3.07           |
| Arf6                 | 4.32           | Bax           | 6.98           |
| Arhgap11a            | 7.62           | Baz1a         | 5.33           |
| Arhgap12             | 7.53           | Bbox1         | -6.28          |
| Arhgdia              | 4.93           | BC003993      | 3.36           |
| Arhgef3              | 8.63           |               |                |

## Supplementary Table 1: Cyclin D1 Differentially-expressed Genes

| Gene Symbol   | D1 Fold Change | Gene Symbol       | D1 Fold Change |
|---------------|----------------|-------------------|----------------|
| BC004022      | 4.49           | C230093N12Rik     | -3.80          |
| BC013672      | 8.50           | C330008K14Rik     | 33.34          |
| BC016423      | 3.47           | C330011F01Rik /// | 4.72           |
| BC016495      | -3.13          | 6430706D22Rik     |                |
| BC021614      | 3.12           | C330027C09Rik     | 7.13           |
| BC023105      | 7.47           | C730027J19Rik     | -10.61         |
| BC023882      | 3.38           | C730029A08Rik     | -12.69         |
| BC024137      | -9.98          | C730036D15Rik     | 14.44          |
| BC026782      | -4.63          | C730036E19Rik     | -4.11          |
| BC048546      | 3.04           | C730043O17        | -4.04          |
| BC049806      | -6.18          | C730048C13Rik     | -10.65         |
| BC049807      | 10.24          | Cabc1             | -3.05          |
| BC053440      | 8.60           | Calm3             | 3.11           |
| BC059842      | 3.55           | Calu              | 3.48           |
| BC068171      | 3.36           | Camk2n2           | 3.16           |
| Bcl10         | 7.57           | Cap1              | 3.29           |
| Bcl2l1        | 3.35           | Car2              | 3.41           |
| Bclaf1        | 4.32           | Car3              | -25.04         |
| Bcmo1         | 4.77           | Car5a             | -6.63          |
| Bcor          | 3.90           | Carhsp1           | 4.31           |
| Bdh2          | -7.13          | Casc4             | 3.45           |
| Bid           | 3.90           | Casp2             | 4.19           |
| Birc5         | 66.31          | Casp7             | 3.17           |
| Blcap         | 3.10           | Casp8ap2          | 9.10           |
| Blmh          | 3.36           | Cav2              | 11.05          |
| Bloc1s2       | 3.23           | Cbr1              | -5.38          |
| Bmper         | 10.25          | Cc2d1a            | 3.38           |
| Bmpr1a        | 3.93           | Ccbl2             | -3.21          |
| Bok           | 3.62           | Ccdc5             | 4.00           |
| Bphl          | -3.83          | Ccdc55            | 3.47           |
| Brca1         | 13.77          | Ccdc59            | 3.42           |
| Brd2          | 3.04           | Ccdc86            | 4.45           |
| Brd4 ///      | 4.53           | Ccna2             | 10.24          |
| Brd8          | 5.98           | Ccnb1             | 6.55           |
| Btbd10        | 5.03           | Ccnb1-rs1 ///     | 10.39          |
| Btg1          | 4.86           | Ccnb1-rs1 ///     | 10.62          |
| Btg2          | 7.20           | Ccnb2             | 20.26          |
| Btg3          | 6.87           | Ccnd2             | 7.42           |
| Bub1          | 6.28           | Ccne1             | 53.90          |
| C130065N10Rik | -5.96          | Ccne2             | 59.51          |
| C1qb          | 11.04          | Ccnf              | 18.64          |
| C1qc          | -6.47          | Ccng1             | 4.10           |

### **Supplementary Table 1: Cyclin D1 Differentially-expressed Genes**

| <b>Gene Symbol</b> | <b>D1 Fold Change</b> | <b>Gene Symbol</b> | <b>D1 Fold Change</b> |
|--------------------|-----------------------|--------------------|-----------------------|
| Ccrn4l             | 3.06                  | Cep192             | 3.15                  |
| Cd151              | 3.56                  | Cep55              | 8.94                  |
| Cd163              | -3.33                 | Cep57              | 3.79                  |
| Cd2bp2             | 5.25                  | Cep76              | 3.32                  |
| Cd36               | 11.91                 | Ces2               | -11.46                |
| Cd59a              | -3.38                 | Ces3               | -14.11                |
| Cd5l               | -16.25                | Cggbp1             | 5.91                  |
| Cd68               | 5.56                  | Chac1              | 7.36                  |
| Cd9                | 14.05                 | Chaf1b             | 4.33                  |
| Cd93               | 8.80                  | Chek1              | 7.07                  |
| Cda                | 3.75                  | Cherp              | 3.36                  |
| Cdc20              | 70.82                 | Chic2              | 4.29                  |
| Cdc25a             | 3.03                  | Chka               | 6.96                  |
| Cdc2a              | 70.04                 | Ciz1               | 3.15                  |
| Cdc42se1           | 3.19                  | Ckap2              | 21.53                 |
| Cdc6               | 7.00                  | Cklf               | 6.88                  |
| Cdca2              | 3.06                  | Cks1b              | 3.71                  |
| Cdca3              | 21.12                 | Cks2               | 3.52                  |
| Cdca4              | 3.48                  | Clca1              | 3.21                  |
| Cdca5              | 23.30                 | Clec4f             | 39.18                 |
| Cdca7              | 8.28                  | Clic1              | 5.99                  |
| Cdca8              | 40.37                 | Clic4              | 3.02                  |
| Cdk2               | 9.96                  | Clmn               | -3.68                 |
| Cdk4               | 4.02                  | Cln8               | 3.25                  |
| Cdk9               | 4.47                  | Clybl              | -3.86                 |
| Cdkn1a             | 94.95                 | Cml1               | -9.84                 |
| Cdkn2c             | 8.00                  | Cml4               | 28.73                 |
| Cdkn3              | 3.25                  | Cml5               | -4.44                 |
| Cdt1               | 138.34                | Cnot4              | 4.08                  |
| Cdyl               | 5.95                  | Cnot6l             | 5.33                  |
| Cebpd              | 4.30                  | Cobl               | 3.71                  |
| Cenpa              | -29.70                | Col27a1            | -4.96                 |
| Cenpc1             | 3.42                  | Col4a1             | 17.48                 |
| Cenpf              | 7.32                  | Col4a2             | 12.51                 |
| Cenpi              | 3.13                  | Colec10            | -7.14                 |
| Cenpk              | 11.22                 | Comm10             | 3.76                  |
| Cenpl              | 10.27                 | Coq10b             | -3.17                 |
| Cenpm              | 8.19                  | Coro1c             | 7.11                  |
| Cenpp              | 3.84                  | Cotl1              | 4.11                  |
| Cenpq              | 4.44                  | Cox6b2             | 6.76                  |
| Centd1             | 3.27                  | Cp                 | 6.12                  |
| Centg2             | 5.41                  | Cpd                | 3.02                  |

## Supplementary Table 1: Cyclin D1 Differentially-expressed Genes

| Gene Symbol                            | D1 Fold Change | Gene Symbol          | D1 Fold Change |
|----------------------------------------|----------------|----------------------|----------------|
| Cpne8                                  | 5.76           | Cyp4a10 /// BC013476 | -4.35          |
| Cpsf6                                  | 3.02           | Cyp4f14              | -11.82         |
| Crebl2                                 | -3.19          | Cyp4f15              | -6.76          |
| Crtap                                  | 3.01           | Cyp4f16              | 6.76           |
| Cry1                                   | -3.05          | Cyp4f16              | 11.21          |
| Cryl1                                  | -5.65          | Cyp4v3               | -3.53          |
| Csflr                                  | -22.21         | Cyp7a1               | -11.96         |
| Csf2ra                                 | 3.85           | D030056L22Rik        | 5.47           |
| Csf2rb1                                | 4.27           | D0H4S114             | -121.77        |
| Csnk1g3                                | 3.29           | D10Jhu81e            | -3.34          |
| Csnk2a2                                | 3.19           | D11Erttd18e          | -4.43          |
| Csrp1                                  | 4.78           | D11Erttd497e         | 6.37           |
| Cstb                                   | 3.28           | D11Erttd759e         | 7.76           |
| Ctbs                                   | 5.93           | D11Lgp2e             | 19.43          |
| Ctdp1                                  | 3.99           | D11Wsu99e            | 3.04           |
| Ctla2a                                 | 8.33           | D12Erttd647e         | 3.27           |
| Ctla2a /// Ctla2b                      | 3.59           | D130020L05Rik        | -4.50          |
| Ctla2b                                 | 3.38           | D14Erttd668e         | 7.52           |
| Ctnnd1                                 | 3.24           | D15Erttd682e         | 7.15           |
| Ctps                                   | 6.02           | D16Erttd472e         | 3.54           |
| Ctps2                                  | 3.37           | D17H6S56E-5          | 247.97         |
| Ctse                                   | -5.07          | D19Erttd721e         | 3.57           |
| Ctnn                                   | 4.06           | D19Erttd737e         | 4.26           |
| Cul7                                   | 3.57           | D1Erttd471e          | 3.94           |
| Cwf1912                                | 3.65           | D1Erttd622e          | 3.30           |
| Cxcl1                                  | 39.59          | D230012E17Rik        | -3.21          |
| Cxcl10                                 | 40.31          | D2Erttd750e          | 5.25           |
| Cxcl9                                  | 42.73          | D630004K10Rik        | -3.30          |
| Cyb561                                 | 21.15          | D6Wsu163e            | 4.49           |
| Cyb5r1                                 | 18.86          | D8Erttd354e          | 3.81           |
| Cyp1a2                                 | -3.07          | D930010J01Rik        | -19.18         |
| Cyp2a4 /// Cyp2a5                      | -14.02         | D9Erttd402e          | -3.24          |
| Cyp2b10                                | 8.66           | Daxx                 | 5.74           |
| Cyp2c37 /// Cyp2c50<br>/// Cyp2c54 /// | -4.70          | Dbf4                 | 31.61          |
| Cyp2c38                                | -4.99          | Dbnidd2              | 3.56           |
| Cyp2c44                                | -6.35          | Dbnl                 | 3.17           |
| Cyp2c50 /// Cyp2c54                    | -15.68         | Dbp                  | -3.37          |
| Cyp2d13                                | -5.95          | Dbr1                 | 5.23           |
| Cyp2d22                                | -5.35          | Dcbld1               | 3.00           |
| Cyp2f2                                 | -3.81          | Dcbld2               | 3.41           |
| Cyp39a1                                | 3.10           | Dck                  | 20.06          |
|                                        |                | Dclre1a              | -3.18          |

## Supplementary Table 1: Cyclin D1 Differentially-expressed Genes

| Gene Symbol          | D1 Fold Change | Gene Symbol   | D1 Fold Change |
|----------------------|----------------|---------------|----------------|
| Dct                  | -26.31         | Dopey2        | 3.20           |
| Dcxr                 | -3.85          | Dpm2          | 3.37           |
| Ddit3                | 3.52           | Dpp9          | 3.34           |
| Ddit4                | 5.02           | Dpyd          | -3.32          |
| Ddo                  | -4.22          | Dpys          | -9.62          |
| Ddr1                 | 4.33           | Dsc2          | 3.43           |
| Ddx1                 | 3.21           | Dtl           | 13.45          |
| Ddx18                | 4.08           | Dtymk         | 8.04           |
| Ddx20                | 3.34           | Dusp10        | 5.30           |
| Ddx21                | 3.65           | Dut           | 13.13          |
| Ddx24                | 3.32           | Dync1h1       | 3.22           |
| Ddx27                | 3.02           | Dynlt1        | 3.05           |
| Ddx39                | 3.69           | Dyrk1a        | 4.54           |
| Ddx52                | 4.33           | E130311K13Rik | 3.22           |
| Ddx58                | 5.65           | E2f7          | 9.66           |
| Decr1                | -4.80          | E2f8          | -6.77          |
| Decr2                | -5.66          | Ear11         | -4.63          |
| Dek                  | 3.57           | Ect2          | 17.87          |
| Depdc1a              | 3.50           | Edg5          | 3.43           |
| Depdc6               | -18.35         | Eftud2        | 4.78           |
| Derl2                | -3.37          | EG226654      | -3.39          |
| Dgcr6                | -4.04          | EG380907      | -3.66          |
| Dgkd                 | 7.13           | EG434402      | -4.66          |
| Dgkz                 | 3.50           | Egfl7         | 3.84           |
| Dhrs13               | 14.37          | Egfr          | -8.53          |
| Dhtkd1               | -7.81          | Egr1          | 49.15          |
| Dimt1                | 3.03           | Ehd4          | 6.86           |
| Dio1                 | -11.86         | Ehhadh        | -4.45          |
| Dip2a                | 4.21           | Eid1          | 6.29           |
| Dna2l                | 5.45           | Eif2ak2       | 6.17           |
| Dnajb4               | -3.41          | Ela1          | -7.48          |
| Dnajc10              | 6.77           | Elavl1        | 3.41           |
| Dnajc5               | 3.56           | Elf2          | 3.88           |
| Dnajc8 /// LOC669266 | 4.46           | Elovl6        | -13.45         |
| Dnajc9               | 24.70          | Emilin1       | 4.20           |
| Dnase2b              | -5.25          | Eml4          | -7.17          |
| Dnmt1                | 23.87          | Emr1          | -3.91          |
| Dnttip1              | 7.89           | Enc1          | 4.10           |
| Dock7                | 4.06           | Enpp3         | 5.37           |
| Dock8                | -3.37          | Epb4.114b     | -3.77          |
| Dom3z                | 4.20           | Ephx2         | -4.68          |
| Donson               | 4.50           | Eppk1         | 4.67           |

## **Supplementary Table 1: Cyclin D1 Differentially-expressed Genes**

| <b>Gene Symbol</b> | <b>D1 Fold Change</b> | <b>Gene Symbol</b> | <b>D1 Fold Change</b> |
|--------------------|-----------------------|--------------------|-----------------------|
| Erccl              | 3.71                  | Fnbp1l             | 3.05                  |
| Erccl6l            | 4.22                  | Fndc3b             | 3.36                  |
| Erccl8             | -6.76                 | Fosl2              | 3.57                  |
| Ero1l              | 4.98                  | Foxn2              | 3.30                  |
| Es22               | -20.99                | Fscn1              | 3.07                  |
| Esco2              | 31.72                 | Ftsj3              | 3.72                  |
| Esf1               | 5.80                  | Fubp1              | 3.53                  |
| Esr1               | -3.36                 | Fuca2              | 4.51                  |
| Ets2               | 5.56                  | Fus                | 23.30                 |
| Ewsr1              | 4.13                  | Fusip1             | 4.63                  |
| Exoc4              | 8.12                  | G6pc               | -13.83                |
| Exod1              | 3.99                  | Gabpa              | 3.78                  |
| Exosc10            | 3.08                  | Gadd45a            | 6.63                  |
| Exosc8             | 5.63                  | Gadd45b            | 3.05                  |
| Ezh2               | 20.09                 | Gadd45g            | 4.98                  |
| F2r                | 5.05                  | Gamt               | -15.47                |
| Faah               | -4.55                 | Gars               | 3.18                  |
| Fabp4              | 7.63                  | Gas2l1             | 3.29                  |
| Fads2              | -5.12                 | Gas6               | 4.01                  |
| Fahd2a             | -3.19                 | Gbp1               | 19.35                 |
| Fasn               | -3.96                 | Gbp2               | 48.41                 |
| Fat1 /// LOC672128 | 4.52                  | Gbp3               | 39.29                 |
| Fbxo30             | 5.05                  | Gbp6               | 7.67                  |
| Fbxo39             | 5.58                  | Gcat               | -3.22                 |
| Fbxo5              | 8.07                  | Gcc2               | 3.00                  |
| Fbxo6              | 6.54                  | Gchfr              | -4.63                 |
| Fbxw8              | 3.09                  | Gcnt2              | 4.09                  |
| Fcna               | -5.40                 | Gdf15              | 13.37                 |
| Fem1b              | 3.12                  | Ghr                | -7.48                 |
| Fen1               | 60.30                 | Gins1              | 5.04                  |
| Fgf1               | -4.12                 | Gja1               | 5.86                  |
| Fgl1               | 4.53                  | Gla                | 3.05                  |
| Fhad1              | 3.41                  | Glo1               | -3.88                 |
| Figl1              | 34.56                 | Gls2               | -7.38                 |
| Fip1l1             | 5.62                  | Gm944              | 3.48                  |
| Flna               | 3.53                  | Gm967              | -3.15                 |
| Flnb               | 3.76                  | Gmn                | 5.24                  |
| Flot1              | 3.48                  | Gna13              | 4.20                  |
| Fmo1               | -9.91                 | Gnai2              | 3.52                  |
| Fmo2               | -3.56                 | Gnmt               | -3.07                 |
| Fmo5               | -14.81                | Golph2             | 4.97                  |
| Fmr1               | 4.09                  | Gpatc4             | 4.22                  |



## Supplementary Table 1: Cyclin D1 Differentially-expressed Genes

| Gene Symbol        | D1 Fold Change | Gene Symbol           | D1 Fold Change |
|--------------------|----------------|-----------------------|----------------|
| Gpbp1              | 3.60           | Hmgcs2                | -7.36          |
| Gpld1              | -3.12          | Hmgn2                 | 3.50           |
| Gpr146             | -4.56          | Hmmr                  | 5.33           |
| Gpr155             | -4.93          | Hmox1                 | 6.51           |
| Grcc10             | -3.12          | Hn1                   | 10.28          |
| Grem2              | -26.00         | Hn11                  | 3.84           |
| Grwd1              | 4.03           | Hnrpa1                | 6.25           |
| Gsdmdc1            | 5.71           | Hnrpa1                | 3.42           |
| Gsta1 /// Gsta2    | -6.63          | Hnrpab                | 8.11           |
| Gsta2              | -7.84          | Hnrpd1                | 4.96           |
| Gsta3              | -10.05         | Hnrpm                 | 5.45           |
| Gsta4              | -9.08          | Hnrpr /// LOC669321   | 3.68           |
| Gstk1              | -3.64          | Hnrpu                 | 3.11           |
| Gsto1              | -5.78          | Homer2                | -7.34          |
| Gtpbp2             | 5.91           | Hrb                   | 7.47           |
| Gulo               | -7.30          | Hsd17b10              | -3.32          |
| Gvin1              | 60.68          | Hsd17b6               | -18.04         |
| Gyg                | 4.66           | Hsd3b2                | -16.96         |
| Gys2 /// LOC633620 | -8.69          | Hsd3b2 /// Hsd3b3 /// | -8.45          |
| H2afx              | 5.56           | Hsd3b6                |                |
| H2-D1              | 14.62          | Hsd3b5                | -71.91         |
| H2-Ea              | -3.26          | Hspa14                | 3.45           |
| H2-K1              | 3.84           | Hspa1a                | 15.10          |
| H2-T22 /// H2-T9   | 5.22           | Hspa8                 | 3.92           |
| Haa0               | -7.42          | Hspb1                 | 15.61          |
| Hacl1              | -5.86          | Htatip                | 3.12           |
| Hal /// LOC638196  | -3.46          | Htf9c                 | 3.28           |
| Hat1               | 7.48           | Hyi                   | -3.30          |
| Hcfc1              | 3.51           | Iah1                  | -3.27          |
| Hebp1              | -3.24          | Ibrdc3                | 3.15           |
| Hells              | 33.20          | Icam1                 | 16.58          |
| Herc5              | 19.02          | Id1                   | 4.34           |
| Hes1               | 3.32           | Ier5                  | 17.86          |
| Hes6               | -9.15          | Ifi202b               | 15.35          |
| Hexb               | 3.60           | Ifi203 /// Ifi204 /// | 3.31           |
| Hirip3             | 5.50           | LOC192690 /// Ifi205  |                |
| Hmga1              | 3.54           | /// Mnda ///          |                |
| Hmgb1              | 3.07           | Ifi27                 | 7.13           |
| Hmgb2              | 39.92          | Ifi35                 | 4.93           |
| Hmgb2              | 48.61          | Ifi44                 | 58.82          |
| Hmgb3              | 10.50          | Ifi47                 | 4.34           |
| Hmgcs1             | 3.24           | Ifih1                 | 4.44           |
|                    |                | Ifit1                 | 50.08          |

## Supplementary Table 1: Cyclin D1 Differentially-expressed Genes

| Gene Symbol | D1 Fold Change | Gene Symbol   | D1 Fold Change |
|-------------|----------------|---------------|----------------|
| Ifit3       | 24.70          | Keg1          | -18.72         |
| Ifnar2      | 3.05           | Khdrbs1       | 3.00           |
| Ifrd1       | 8.12           | Khk           | -3.12          |
| Ift81       | 4.80           | Kif20a        | 8.77           |
| Igfals      | -10.35         | Kif22         | 4.77           |
| Igfbp1      | 21.04          | Kif2a         | 4.60           |
| Igfbp2      | -5.89          | Kif2c         | 18.13          |
| Igsf8       | 3.87           | Klf12         | -3.41          |
| Igtp        | 4.92           | Klf6          | 31.19          |
| Il10rb      | 3.99           | Klhdc4        | 3.80           |
| Il13ra1     | 3.26           | Klh124        | -3.02          |
| Il18bp      | 35.31          | Klkb1         | -9.47          |
| Il1rap      | -3.62          | Kpnb1         | 5.88           |
| Il1rn       | 3.11           | Ktn1          | 3.20           |
| Il33        | 5.10           | Kynu          | -4.45          |
| Ilf2        | 3.01           | Lactb2        | -3.17          |
| Immp21      | -3.32          | Larp7         | 5.40           |
| Incenp      | 9.71           | Lbp           | 6.80           |
| Inhbb       | 10.99          | Lbr           | 3.33           |
| Inhbc       | -3.53          | Lcn2          | 751.18         |
| Inmt        | -55.84         | Lect1         | -8.87          |
| Ints7       | 3.25           | Leprot1       | 3.92           |
| Ipo9        | 5.40           | Lgals1        | 4.30           |
| Iqgap1      | 7.02           | Lgals3bp      | 13.80          |
| Iqgap3      | 3.39           | Lgmh          | 15.40          |
| Irf1        | 5.09           | Lifr          | -9.36          |
| Irf7        | 38.78          | Lig1          | 42.32          |
| Irgm        | 8.80           | Limd2         | 3.04           |
| Isg2011     | 8.64           | Lims1         | 4.63           |
| Isgf3g      | 4.51           | Lin7a         | -7.62          |
| Isyna1      | 12.84          | Lipc          | -13.54         |
| Itga5       | 4.36           | Lipg          | -3.22          |
| Itgb5       | 3.62           | Litaf         | 5.33           |
| Itm2c       | 7.50           | Lmna          | 10.75          |
| Ivd         | -5.93          | Lnp           | 3.12           |
| Iws1        | 3.12           | LOC100045448  | 3.01           |
| Josd3       | 4.42           | March7        |                |
| Jun         | 6.23           | LOC278757 /// | 3.39           |
| Junb        | 7.80           | EG631624      |                |
| Kctd3       | 5.31           | LOC552905     | 6.61           |
| Kdelc1      | 3.07           | LOC630509 /// | 9.01           |
| Keap1       | 3.56           | LOC674192     |                |
|             |                | LOC630539     | 5.40           |

## Supplementary Table 1: Cyclin D1 Differentially-expressed Genes

| Gene Symbol | D1 Fold Change | Gene Symbol         | D1 Fold Change |
|-------------|----------------|---------------------|----------------|
| LOC633966   | 3.62           | Mcm3                | 53.52          |
| LOC637741   | 3.53           | Mcm4                | 53.71          |
| LOC668215   | -7.54          | Mcm5                | 84.57          |
| LOC672274   | 4.44           | Mcm6                | 138.82         |
| LOC673662   | -3.99          | Mcm7                | 26.93          |
| LOC677168   | 96.61          | Mcm7 /// LOC433027  | 7.64           |
| Lonrf3      | 3.13           | Mdc1                | 3.88           |
| Lpgat1      | 3.51           | Mdm2                | 10.29          |
| Lrat        | -3.88          | Med28               | 3.64           |
| Lrp10       | 3.28           | Med9                | 5.43           |
| Lrrc59      | 4.93           | Mef2a               | 3.76           |
| Lrrfip1     | 5.44           | Melk                | 5.96           |
| Lsm2        | 4.43           | Mettl6              | 4.49           |
| Lsm5        | 3.10           | MGC73635            | 104.84         |
| Lsm8        | 12.29          | Mgea5               | 5.01           |
| Ltb4dh      | 3.10           | Mgll                | -7.51          |
| Luzp1       | 3.44           | Mier3               | 4.47           |
| Ly6a        | 29.99          | Mki67               | 48.64          |
| Ly6c        | 8.48           | Mkrn1               | 6.39           |
| Ly6e        | 5.31           | Mikl                | 34.42          |
| Ly96        | 6.39           | Milt10              | 3.06           |
| Lzic        | 4.01           | Milt4               | 3.20           |
| M6pr        | 3.47           | Mlxip1              | -3.03          |
| M6prbp1     | 5.89           | Moap1               | 3.02           |
| Mad2l1      | 19.20          | Morc3               | 3.83           |
| Mad2l2      | 7.34           | Morc4               | 5.71           |
| Maged2      | 3.70           | Mosc1               | -6.69          |
| Mageh1      | 3.43           | Mospd1              | 3.55           |
| Map3k7ip2   | 4.28           | Mpa2l               | 23.99          |
| Mapk3       | 4.03           | Mpa2l /// LOC626578 | 15.35          |
| Mapre1      | 4.20           | /// LOC673101       |                |
| Mapre2      | -5.88          | Mpeg1               | 3.65           |
| Marveld2    | 3.07           | Mpg                 | 3.22           |
| Masp1       | -5.44          | Mphosph1            | 3.92           |
| Mast2       | 3.03           | Mpp4                | -4.31          |
| Mbd1        | 9.45           | Mpzl1               | 5.60           |
| Mccc1       | -3.33          | Ms4a4d              | 3.02           |
| Mccc2       | -4.46          | Ms4a6d              | 3.26           |
| Mcee        | -4.11          | Msh2                | 3.50           |
| Mcl1        | 4.27           | Msh6                | 11.88          |
| Mcm10       | -7.65          | Msl2l1              | 3.43           |
| Mcm2        | 49.91          | Msn                 | 3.94           |

## **Supplementary Table 1: Cyclin D1 Differentially-expressed Genes**

| <b>Gene Symbol</b> | <b>D1 Fold Change</b> | <b>Gene Symbol</b> | <b>D1 Fold Change</b> |
|--------------------|-----------------------|--------------------|-----------------------|
| Mt1                | 77.55                 | Nek2               | 8.59                  |
| Mt2                | 266.69                | Neo1               | 4.39                  |
| Mta2               | 3.16                  | Nfia               | -3.07                 |
| Mtap4              | 3.73                  | Nfkbil1            | 3.16                  |
| Mtdh               | 3.54                  | Nfkbiz             | 3.12                  |
| Mthfd1             | -5.95                 | Ngp                | 3.64                  |
| Mthfd2             | 11.34                 | Nid1               | 7.02                  |
| Mthfr              | 5.39                  | Nipbl              | 3.06                  |
| Mtm1               | 11.16                 | Nit2               | -3.48                 |
| Mtmr2              | 4.10                  | Nlrp6              | -3.95                 |
| Mtpn               | 3.56                  | Nmi                | 4.43                  |
| Mtrf11             | 3.22                  | Nmral1             | 8.64                  |
| Mum1               | 5.82                  | Nnmt               | 5.04                  |
| Mup1               | -70.33                | Nnp1               | 3.88                  |
| Mup3               | -3.93                 | Nol11              | 3.51                  |
| Mvd                | -3.07                 | Nol5               | 4.89                  |
| Mvp                | 13.75                 | Nol5a              | 3.05                  |
| Mxi1               | -3.10                 | Nola1              | 4.32                  |
| Mybbp1a            | 5.09                  | Nolc1              | 3.54                  |
| Myd116             | 6.18                  | Notch1             | 3.30                  |
| Myg1               | 3.45                  | Nox4               | -6.86                 |
| Myh10              | 6.44                  | Npat               | 5.67                  |
| Myo10              | 3.20                  | Nr1i3              | -6.17                 |
| Myo1c              | 4.57                  | Nras               | 3.89                  |
| Myo5b              | 3.22                  | Nrp1               | -4.66                 |
| Myo9b              | 3.32                  | Nsmce1             | 6.28                  |
| Myot               | -4.35                 | Nt5c3l             | 3.84                  |
| Nagk               | 3.22                  | Nt5dc2             | 3.22                  |
| Nans               | 6.69                  | Nubp1              | 3.23                  |
| Nap1l1             | 9.19                  | Nudt7              | -11.41                |
| Narg1              | 4.39                  | Nuf2               | 16.15                 |
| Nasp               | 5.67                  | Nup133             | 4.08                  |
| Ncapd3             | 11.32                 | Nup153             | 3.55                  |
| Ncapg              | 7.78                  | Nup160             | 6.75                  |
| Ncapg2             | 7.82                  | Nup205             | 3.88                  |
| Ncaph              | 12.16                 | Nup43              | 5.21                  |
| Ncdn               | 3.40                  | Nup50              | 9.19                  |
| Ncl                | 3.37                  | Nup54              | 4.19                  |
| Ncoa2              | 3.28                  | Nup62              | 3.10                  |
| Ncoa5              | 3.40                  | Nup85              | 6.45                  |
| Ndrgl              | 21.49                 | Nup93              | 8.50                  |
| Nedd1              | 3.48                  | Nup11              | 5.44                  |

## Supplementary Table 1: Cyclin D1 Differentially-expressed Genes

| <b>Gene Symbol</b> | <b>D1 Fold Change</b> | <b>Gene Symbol</b>   | <b>D1 Fold Change</b> |
|--------------------|-----------------------|----------------------|-----------------------|
| Nusap1             | 14.45                 | Pea15                | 6.19                  |
| Oas1a              | 66.22                 | Peli1                | 4.39                  |
| Oas1l              | 25.23                 | Pelp1                | 3.46                  |
| Oat                | -4.11                 | Per2                 | -10.55                |
| Obfc2a             | 4.45                  | Pex26                | -4.51                 |
| Ociad2             | -3.72                 | Pfn2                 | 5.19                  |
| Ogfr               | 3.68                  | Pgd                  | 3.58                  |
| Onecut1            | -20.38                | Pgm1                 | 4.77                  |
| Onecut2            | -7.75                 | Pgs1                 | 4.41                  |
| Orc6l              | 5.63                  | Phc2                 | 9.12                  |
| Orm2               | 99.46                 | Phf10                | 5.33                  |
| Osgin2             | 4.05                  | Phf23                | 3.09                  |
| Osmr               | 12.39                 | Phf8                 | -3.54                 |
| Otc                | -3.46                 | Phlda3               | 6.93                  |
| Otud1              | 5.09                  | Pigy                 | -3.75                 |
| Pank1              | -4.34                 | Pik3cd               | -5.69                 |
| Pap                | 220.87                | Pip5k2c              | 4.24                  |
| Papss2             | -3.73                 | Pipox                | -6.70                 |
| Parp11             | 7.00                  | Pitpnm1              | 5.55                  |
| Parp12             | 7.71                  | Pklr                 | -7.79                 |
| Parp14             | 16.44                 | Pkm2                 | 6.00                  |
| Parp16             | 3.67                  | Plac8                | 11.83                 |
| Parp2              | 3.47                  | Plcl2                | 3.06                  |
| Paxip1             | 3.58                  | Pld1                 | 3.31                  |
| Pbk                | 16.67                 | Plec1                | 3.02                  |
| Pbld               | -3.52                 | Plec1 /// LOC671535  | 5.26                  |
| Pbx3               | 12.24                 | Plekhb1              | -6.30                 |
| Pcbp4              | 6.65                  | Plekhhl1             | 5.73                  |
| Pcca               | -3.32                 | Plk1                 | 5.04                  |
| Pcgf5              | 4.77                  | Plk4                 | 8.94                  |
| Pcm1               | 4.20                  | Plp2                 | 5.29                  |
| Pcmt1              | 4.58                  | Plscr1               | 10.55                 |
| Pcmtl1             | -3.36                 | Plscr1 /// LOC433328 | 15.65                 |
| Pcna               | 5.60                  | Plxnb1               | 4.59                  |
| Pdcd4              | -3.13                 | Pml                  | 6.00                  |
| Pde4b              | 4.78                  | Pola1                | 11.39                 |
| Pdgfrb             | 4.81                  | Pold1                | 7.83                  |
| Pdhb               | -3.24                 | Pold3                | 3.76                  |
| Pdk1               | -19.73                | Pole2                | 3.88                  |
| Pdk2               | -3.68                 | Pole3                | 3.36                  |
| Pdk4               | 9.48                  | Polk                 | 4.17                  |
| Pdxk               | -3.33                 | Polr3a               | 3.07                  |

## **Supplementary Table 1: Cyclin D1 Differentially-expressed Genes**

| <b>Gene Symbol</b> | <b>D1 Fold Change</b> | <b>Gene Symbol</b> | <b>D1 Fold Change</b> |
|--------------------|-----------------------|--------------------|-----------------------|
| Pom121             | 3.12                  | Pttg1              | 20.44                 |
| Pop7               | 3.90                  | Pvr                | 4.53                  |
| Por                | -7.12                 | Pwp1               | 3.00                  |
| Ppap2c             | 3.42                  | Pxmp2              | -4.34                 |
| Ppapdc1            | 4.00                  | Qars               | 3.09                  |
| Ppfibp1            | 7.37                  | Qk                 | 3.52                  |
| Ppm1f              | 3.94                  | Rab10              | 3.44                  |
| Ppm1g              | 4.61                  | Rab13              | 4.04                  |
| Ppm1k              | -3.64                 | Rab31              | 5.38                  |
| Ppm1m              | 4.56                  | Rab4b              | 3.01                  |
| Ppm2c              | 3.12                  | Rabepk             | -3.42                 |
| Ppp1r3b            | -4.76                 | Racgap1            | 3.83                  |
| Ppp1r8             | 3.35                  | Rad21              | 3.72                  |
| Ppp2r2a            | 3.11                  | Rad50              | 3.74                  |
| Ppp4c              | 4.89                  | Rad51              | 13.99                 |
| Ppp4r1             | 3.05                  | Rad51ap1           | 7.96                  |
| Pprc1              | 3.01                  | Rad51l1            | 3.71                  |
| Ppwd1              | 3.22                  | Ranbp5             | 3.90                  |
| Prc1               | 18.16                 | Rars               | 3.34                  |
| Prg1               | 3.37                  | Rb1                | 4.20                  |
| Prg4               | 6.43                  | Rbbp6              | 3.76                  |
| Prim1              | 19.62                 | Rbbp8              | 8.62                  |
| Prim2              | 5.42                  | Rbl1               | 13.99                 |
| Prkab1             | 3.37                  | Rbm19              | 4.01                  |
| Prlr               | -7.49                 | Rbm22              | 3.76                  |
| Prmt1              | 3.06                  | Rbms1              | 3.23                  |
| Prodh              | -8.14                 | Rbmx               | 3.68                  |
| Prodh2             | -4.83                 | Rbpms              | 4.02                  |
| Prpf40a            | 3.58                  | Rcc2               | 6.05                  |
| Prune              | 9.37                  | Rcn1               | 4.53                  |
| Psat1              | 83.75                 | Rcn2               | 3.44                  |
| Pscd2              | 3.33                  | Rdbp               | 4.27                  |
| Psg21              | -3.47                 | Rdh16              | -17.94                |
| Psip1              | 5.04                  | Recc1              | 4.03                  |
| Psmb8              | 4.91                  | Reep4              | 3.42                  |
| Psmb9              | 7.64                  | Reep5              | 15.68                 |
| Psmc7              | 3.09                  | Reln               | -8.54                 |
| Pspc1              | 3.48                  | Reps1              | 5.61                  |
| Ptbp2              | 3.48                  | Retsat             | -8.07                 |
| Pten               | -3.34                 | Rfc3               | 12.42                 |
| Ptpn12             | 3.60                  | Rfc4               | 16.50                 |
| Ptprd              | -5.55                 | Rfc5               | 13.61                 |

## **Supplementary Table 1: Cyclin D1 Differentially-expressed Genes**

| <b>Gene Symbol</b> | <b>D1 Fold Change</b> | <b>Gene Symbol</b>  | <b>D1 Fold Change</b> |
|--------------------|-----------------------|---------------------|-----------------------|
| Rfwd3              | 3.27                  | Sardh               | -9.62                 |
| Rgs5               | 3.33                  | Sars                | 3.06                  |
| Rhbdd1             | 4.04                  | Sart3               | 3.13                  |
| Rhoc               | 6.94                  | Sat1                | 3.17                  |
| Rhpn2              | 5.61                  | Sc5d                | -6.83                 |
| Rif1 /// LOC671598 | 8.03                  | Scotin              | 13.57                 |
| Riok1              | 3.30                  | Scrn3               | -4.61                 |
| Rit1               | 4.14                  | Scyl1bp1            | 5.45                  |
| Rnaseh2a           | 3.87                  | Sdro                | -3.25                 |
| Rnd3               | 3.58                  | Sec61a1             | 3.44                  |
| Rnf121             | 5.32                  | Sel1l               | -3.67                 |
| Rnf13              | -3.22                 | Sema6c              | -3.04                 |
| Rnf168             | 3.47                  | Senp2               | 4.40                  |
| Rnpc3              | 4.45                  | Senp6               | 3.13                  |
| Rnps1              | 3.41                  | Sephs1              | 3.05                  |
| Rnuxa              | 3.65                  | Sept10              | 4.15                  |
| Rod1               | 4.17                  | Sept11              | 5.55                  |
| Rorc               | -5.43                 | Serinc3             | 4.00                  |
| Rpa1               | 7.21                  | Serinc5             | 3.67                  |
| Rpa2               | 22.62                 | Serpina3n           | 3.04                  |
| Rpap1              | 3.12                  | Serpina4-ps1        | -4.49                 |
| Rqcd1              | 4.95                  | Serpina6            | -9.76                 |
| Rras               | 4.10                  | Serpina7            | 6.97                  |
| Rras2              | 3.64                  | Serpinh1            | 3.24                  |
| Rrm1               | 33.13                 | Sertad1             | 4.10                  |
| Rrm2               | 114.73                | Sf3a1               | 3.62                  |
| Rsad2              | 31.30                 | Sf3a3               | 3.15                  |
| Rtcd1              | 3.34                  | Sf3a3 /// LOC626830 | 3.77                  |
| Rtn4               | 3.67                  | Sf3b3               | 3.79                  |
| Rtp4               | 10.68                 | Sfpq                | 3.14                  |
| S100a10            | 4.01                  | Sfrs1               | 6.14                  |
| S100a11            | 54.50                 | Sfrs10              | 3.25                  |
| S100a6             | 3.53                  | Sgk3                | 3.28                  |
| S100a8             | 190.16                | Sh3bgrl2            | 3.36                  |
| S100a9             | 130.42                | Sh3bgrl3            | 3.78                  |
| Saa1               | 7.10                  | Shcbp1              | 30.01                 |
| Saa2               | 33.57                 | Shmt1               | -4.32                 |
| Saa3               | 60.39                 | Shroom3             | 3.03                  |
| Sae1               | 5.60                  | Siah1a              | 3.56                  |
| Samd9l             | 16.52                 | Sirt1               | 3.25                  |
| Samhd1             | 5.06                  | Sirt3               | -3.69                 |
| Sap30bp            | 3.00                  | Siva1               | 5.39                  |

### Supplementary Table 1: Cyclin D1 Differentially-expressed Genes

| Gene Symbol         | D1 Fold Change | Gene Symbol         | D1 Fold Change |
|---------------------|----------------|---------------------|----------------|
| Skp2                | 6.00           | Snx12               | 3.56           |
| Slbp                | 11.77          | Snx16               | 7.30           |
| Slc10a1             | -7.52          | Snx5                | 5.36           |
| Slc13a3             | 10.19          | Snx6                | 3.53           |
| Slc13a5             | 3.07           | Socs2               | -20.16         |
| Slc16a2             | -7.34          | Socs3               | 44.54          |
| Slc16a6             | 3.20           | Socs6               | 4.46           |
| Slc17a2             | -3.29          | Sord                | -9.77          |
| Slc1a4              | 3.01           | Sp3                 | 3.76           |
| Slc22a7             | -11.18         | Spaca3              | -3.52          |
| Slc25a19            | -3.63          | Sparc               | 5.50           |
| Slc25a30            | -8.09          | Spata13             | 3.10           |
| Slc25a42            | -3.30          | Spbc25              | 9.85           |
| Slc2a1              | 9.60           | Spg3a               | 3.55           |
| Slc2a2              | -11.02         | Spna2               | 3.52           |
| Slc37a4             | -7.41          | Spp1                | 3.88           |
| Slc39a14            | 3.99           | Spp2                | -3.78          |
| Slc39a6             | 6.73           | Sprr1a              | 6.56           |
| Slc3a2              | 3.81           | Sptlc2              | 10.08          |
| Slc41a2             | 4.34           | Sqstm1              | 3.28           |
| Slc9a3r2            | -4.84          | Srd5a1              | -19.79         |
| Slco1a1             | -23.63         | Srprb               | 3.12           |
| Slco1a4             | -11.31         | Srr                 | -4.29          |
| Slco2b1             | -3.64          | Srrm2               | 3.12           |
| Slfn8               | 3.33           | Srxn1               | 19.02          |
| Slfn9               | 60.13          | Ss18                | 3.43           |
| Slpi                | 15.87          | Ssrp1               | 6.17           |
| Smarca5             | 4.35           | Ssx2ip              | 4.19           |
| Smc2                | 30.64          | Stag1               | 4.07           |
| Smc4                | 17.98          | Stam2               | 3.05           |
| Smc5                | 5.43           | Stard4              | -5.46          |
| Smc6                | 3.89           | Stard5              | -3.19          |
| Smchd1              | 4.65           | Stat1               | 27.52          |
| Smpd13a             | -4.19          | Stat3               | 5.63           |
| Snapc2              | 4.48           | Steap4              | 6.71           |
| Snhg3 /// LOC670438 | 4.87           | Stk17b              | 4.41           |
| Snip1               | 3.62           | Stmn1               | 16.89          |
| Snord22             | 4.65           | Stmn1 /// LOC639458 | 5.57           |
| Snrpa1              | 3.08           | Stom                | 7.73           |
| Snrpd1              | 3.15           | Sucnr1              | -6.20          |
| Sntb2               | 5.05           | Sult1b1             | -5.30          |
| Snx1                | 3.21           | Sult5a1             | -4.99          |



## Supplementary Table 1: Cyclin D1 Differentially-expressed Genes

| <u>Gene Symbol</u> | <u>D1 Fold Change</u> | <u>Gene Symbol</u> | <u>D1 Fold Change</u> |
|--------------------|-----------------------|--------------------|-----------------------|
| Suox               | -4.91                 | Thoc4              | 3.98                  |
| Supt16h            | 3.15                  | Thoc4 /// Refbp2   | 6.07                  |
| Suv39h1            | 3.68                  | Thrap1             | 3.47                  |
| Suz12              | 3.88                  | Thrap3             | 3.37                  |
| Syce2              | 10.62                 | Thrsp              | -16.85                |
| Sycp3              | -4.32                 | Tinf2              | 5.67                  |
| Syncrip            | 4.41                  | Tipin              | 13.51                 |
| Tacc2              | 4.13                  | Tjp2               | 9.16                  |
| Tacc3              | 8.17                  | Tlk2               | 4.85                  |
| Taf1               | 5.26                  | Tln1               | 3.39                  |
| Taf9               | 3.15                  | Tlr3               | 4.35                  |
| Tagap              | 3.90                  | Tm2d2              | -3.77                 |
| Tagln2             | 5.27                  | Tm9sf2             | -26.38                |
| Tap1               | 25.06                 | Tm9sf3             | -4.09                 |
| Tap2               | 11.86                 | Tmem106a           | 3.10                  |
| Tapbp              | 4.49                  | Tmem129            | 8.33                  |
| Tardbp             | 3.45                  | Tmem140            | 3.44                  |
| Tax1bp3            | 4.42                  | Tmem14a            | -4.39                 |
| Tbc1d10b           | 3.31                  | Tmem165            | 4.16                  |
| Tbk1               | 5.33                  | Tmem168            | 3.57                  |
| Tbp11              | 3.11                  | Tmem23             | 4.49                  |
| Tbrg1              | 3.94                  | Tmem43             | 4.33                  |
| Tceal8             | 4.06                  | Tmem51             | 3.52                  |
| Tcerg1             | 3.81                  | Tmem59             | -5.39                 |
| Tcf19              | 39.43                 | Tmpo               | 10.86                 |
| Tcirg1             | 4.64                  | Tmprss6            | -3.26                 |
| Tdrd7              | 5.03                  | Tmsb10             | 66.35                 |
| Tef                | -5.77                 | Tnfaip1            | 4.22                  |
| Terf1              | 4.30                  | Tnfaip2            | 3.97                  |
| Terf2              | 3.14                  | Tnfrsf11b          | 5.19                  |
| Tex10              | 3.51                  | Tnfrsf1a           | 3.95                  |
| Tfip11             | 4.06                  | Tnfrsf1b           | 3.87                  |
| Tgif               | 3.49                  | Tomm20             | -3.19                 |
| Tgm1               | 3.96                  | Top2a              | 47.91                 |
| Tgm2               | 8.47                  | Topbp1             | 15.34                 |
| Tgoln1             | 4.40                  | Topors             | 4.49                  |
| Tgtp               | 72.46                 | Tor1aip1           | 5.48                  |
| Thbd               | 11.54                 | Tpm1               | 6.30                  |
| Thbs1              | 4.24                  | Tpm3               | 8.05                  |
| Them2              | -5.74                 | Tpm4               | 4.83                  |
| Thex1              | 13.68                 | Tpr                | 5.37                  |
| Thoc1              | 4.09                  | Tprkb              | -3.09                 |

## **Supplementary Table 1: Cyclin D1 Differentially-expressed Genes**

| <b>Gene Symbol</b>         | <b>D1 Fold Change</b> | <b>Gene Symbol</b>  | <b>D1 Fold Change</b> |
|----------------------------|-----------------------|---------------------|-----------------------|
| Tpte2                      | 3.41                  | Ucp2                | 5.70                  |
| Tpx2                       | 5.74                  | Ugt2a3              | -3.64                 |
| Traf3                      | 3.17                  | Ugt2b1              | -4.12                 |
| Trafd1                     | 4.83                  | Ugt3a1              | -8.20                 |
| Trib3                      | 13.25                 | Ugt3a1 /// EG666512 | -6.43                 |
| Trim24                     | 3.71                  | Ugt3a2              | -3.36                 |
| Trim25                     | 3.17                  | Uhrf1               | 31.98                 |
| Trim27                     | 4.06                  | Ulk2                | -3.84                 |
| Trim30                     | 18.11                 | Ung                 | 3.49                  |
| Trip13                     | 19.06                 | Uroc1               | -5.14                 |
| Trip6                      | 3.76                  | Usp1                | 6.87                  |
| Trmt1                      | 3.21                  | Usp18               | 59.80                 |
| Trp53bp1                   | 4.68                  | Usp2                | -17.33                |
| Trp53inp1                  | 5.11                  | Utp20               | 3.11                  |
| Tshz1                      | 5.89                  | Utp6                | 4.76                  |
| Tspan3                     | 3.00                  | Vars2               | 8.11                  |
| Tspo                       | 3.08                  | Vasp                | 3.88                  |
| Tsr1                       | 3.29                  | Vil2                | 3.51                  |
| Tsr2                       | 3.48                  | Vim                 | 10.08                 |
| Tssc1                      | 3.26                  | Vnn1                | 15.80                 |
| Tssc4                      | 6.16                  | Vnn3                | 7.20                  |
| Ttk                        | 3.99                  | Vsig4               | -20.97                |
| Tuba2                      | 4.73                  | Wac                 | 5.16                  |
| Tubb2c                     | 4.01                  | Wbp5                | 5.57                  |
| Tubb5                      | 8.37                  | Wdr1                | 3.63                  |
| Tubb6                      | 123.56                | Wdr20a              | 3.59                  |
| Tubgcp2                    | 13.06                 | Wdr57               | 4.03                  |
| Tubgcp3                    | 3.15                  | Whsc11              | -3.32                 |
| Tug1                       | 4.78                  | Wsb1                | 4.59                  |
| Twsg1                      | 8.03                  | Wwp1                | -3.34                 |
| Tyki                       | 11.51                 | Xlkd1               | 14.27                 |
| Tyms /// Tyms-ps           | 17.94                 | Xpo6                | 3.02                  |
| Ubap1                      | 4.26                  | Xrn2                | 3.53                  |
| Ubap2                      | 4.67                  | Ywhaz               | 4.23                  |
| Ube1l                      | 10.58                 | Zap70               | -3.12                 |
| Ube1l ///<br>D330022A01Rik | 5.30                  | Zbp1                | 40.62                 |
| Ube2c                      | 79.02                 | Zc3h15              | 4.11                  |
| Ube2l6                     | 3.97                  | Zcchc11             | 4.14                  |
| Ube2s                      | 4.89                  | Zdhhc14             | -5.91                 |
| Ube2t                      | 6.41                  | Zdhhc18             | 3.00                  |
| Ube2z                      | 3.75                  | Zfa /// Zfx         | -3.37                 |
|                            |                       | Zfand2a             | 17.84                 |

### **Supplementary Table 1: Cyclin D1 Differentially-expressed Genes**

| <b>Gene Symbol</b> | <b>D1 Fold Change</b> |
|--------------------|-----------------------|
| Zfand3             | 4.63                  |
| Zfp263             | 3.06                  |
| Zfp313             | 3.69                  |
| Zfp367             | 8.86                  |
| Zfp386             | 4.29                  |
| Zfp422-rs1         | 3.13                  |
| Zfp451             | 3.23                  |
| Zfp53              | 3.50                  |
| Zfp622             | 3.58                  |
| Zfp644             | 4.00                  |
| Zfp740             | 3.59                  |
| Zfp91              | 3.30                  |
| Znhit3             | 3.14                  |
| Znrf2              | -3.14                 |
| Zrsr2              | 3.64                  |
| Zwilch             | 16.75                 |
| Zwint              | 9.61                  |
| Zzz3               | 3.97                  |

## Supplementary Table 2: Cyclin D2 Differentially-expressed Genes

| Gene Symbol | Gene Name   | Gene Symbol | Gene Name   |
|-------------|-------------|-------------|-------------|
| CCND2       | Cyclin D2   | CCND2       | Cyclin D2   |
| CCND1       | Cyclin D1   | CCND1       | Cyclin D1   |
| CCND3       | Cyclin D3   | CCND3       | Cyclin D3   |
| CCND4       | Cyclin D4   | CCND4       | Cyclin D4   |
| CCNE1       | Cyclin E1   | CCNE1       | Cyclin E1   |
| CCNE2       | Cyclin E2   | CCNE2       | Cyclin E2   |
| CCNE3       | Cyclin E3   | CCNE3       | Cyclin E3   |
| CCNE4       | Cyclin E4   | CCNE4       | Cyclin E4   |
| CCNE5       | Cyclin E5   | CCNE5       | Cyclin E5   |
| CCNE6       | Cyclin E6   | CCNE6       | Cyclin E6   |
| CCNE7       | Cyclin E7   | CCNE7       | Cyclin E7   |
| CCNE8       | Cyclin E8   | CCNE8       | Cyclin E8   |
| CCNE9       | Cyclin E9   | CCNE9       | Cyclin E9   |
| CCNE10      | Cyclin E10  | CCNE10      | Cyclin E10  |
| CCNE11      | Cyclin E11  | CCNE11      | Cyclin E11  |
| CCNE12      | Cyclin E12  | CCNE12      | Cyclin E12  |
| CCNE13      | Cyclin E13  | CCNE13      | Cyclin E13  |
| CCNE14      | Cyclin E14  | CCNE14      | Cyclin E14  |
| CCNE15      | Cyclin E15  | CCNE15      | Cyclin E15  |
| CCNE16      | Cyclin E16  | CCNE16      | Cyclin E16  |
| CCNE17      | Cyclin E17  | CCNE17      | Cyclin E17  |
| CCNE18      | Cyclin E18  | CCNE18      | Cyclin E18  |
| CCNE19      | Cyclin E19  | CCNE19      | Cyclin E19  |
| CCNE20      | Cyclin E20  | CCNE20      | Cyclin E20  |
| CCNE21      | Cyclin E21  | CCNE21      | Cyclin E21  |
| CCNE22      | Cyclin E22  | CCNE22      | Cyclin E22  |
| CCNE23      | Cyclin E23  | CCNE23      | Cyclin E23  |
| CCNE24      | Cyclin E24  | CCNE24      | Cyclin E24  |
| CCNE25      | Cyclin E25  | CCNE25      | Cyclin E25  |
| CCNE26      | Cyclin E26  | CCNE26      | Cyclin E26  |
| CCNE27      | Cyclin E27  | CCNE27      | Cyclin E27  |
| CCNE28      | Cyclin E28  | CCNE28      | Cyclin E28  |
| CCNE29      | Cyclin E29  | CCNE29      | Cyclin E29  |
| CCNE30      | Cyclin E30  | CCNE30      | Cyclin E30  |
| CCNE31      | Cyclin E31  | CCNE31      | Cyclin E31  |
| CCNE32      | Cyclin E32  | CCNE32      | Cyclin E32  |
| CCNE33      | Cyclin E33  | CCNE33      | Cyclin E33  |
| CCNE34      | Cyclin E34  | CCNE34      | Cyclin E34  |
| CCNE35      | Cyclin E35  | CCNE35      | Cyclin E35  |
| CCNE36      | Cyclin E36  | CCNE36      | Cyclin E36  |
| CCNE37      | Cyclin E37  | CCNE37      | Cyclin E37  |
| CCNE38      | Cyclin E38  | CCNE38      | Cyclin E38  |
| CCNE39      | Cyclin E39  | CCNE39      | Cyclin E39  |
| CCNE40      | Cyclin E40  | CCNE40      | Cyclin E40  |
| CCNE41      | Cyclin E41  | CCNE41      | Cyclin E41  |
| CCNE42      | Cyclin E42  | CCNE42      | Cyclin E42  |
| CCNE43      | Cyclin E43  | CCNE43      | Cyclin E43  |
| CCNE44      | Cyclin E44  | CCNE44      | Cyclin E44  |
| CCNE45      | Cyclin E45  | CCNE45      | Cyclin E45  |
| CCNE46      | Cyclin E46  | CCNE46      | Cyclin E46  |
| CCNE47      | Cyclin E47  | CCNE47      | Cyclin E47  |
| CCNE48      | Cyclin E48  | CCNE48      | Cyclin E48  |
| CCNE49      | Cyclin E49  | CCNE49      | Cyclin E49  |
| CCNE50      | Cyclin E50  | CCNE50      | Cyclin E50  |
| CCNE51      | Cyclin E51  | CCNE51      | Cyclin E51  |
| CCNE52      | Cyclin E52  | CCNE52      | Cyclin E52  |
| CCNE53      | Cyclin E53  | CCNE53      | Cyclin E53  |
| CCNE54      | Cyclin E54  | CCNE54      | Cyclin E54  |
| CCNE55      | Cyclin E55  | CCNE55      | Cyclin E55  |
| CCNE56      | Cyclin E56  | CCNE56      | Cyclin E56  |
| CCNE57      | Cyclin E57  | CCNE57      | Cyclin E57  |
| CCNE58      | Cyclin E58  | CCNE58      | Cyclin E58  |
| CCNE59      | Cyclin E59  | CCNE59      | Cyclin E59  |
| CCNE60      | Cyclin E60  | CCNE60      | Cyclin E60  |
| CCNE61      | Cyclin E61  | CCNE61      | Cyclin E61  |
| CCNE62      | Cyclin E62  | CCNE62      | Cyclin E62  |
| CCNE63      | Cyclin E63  | CCNE63      | Cyclin E63  |
| CCNE64      | Cyclin E64  | CCNE64      | Cyclin E64  |
| CCNE65      | Cyclin E65  | CCNE65      | Cyclin E65  |
| CCNE66      | Cyclin E66  | CCNE66      | Cyclin E66  |
| CCNE67      | Cyclin E67  | CCNE67      | Cyclin E67  |
| CCNE68      | Cyclin E68  | CCNE68      | Cyclin E68  |
| CCNE69      | Cyclin E69  | CCNE69      | Cyclin E69  |
| CCNE70      | Cyclin E70  | CCNE70      | Cyclin E70  |
| CCNE71      | Cyclin E71  | CCNE71      | Cyclin E71  |
| CCNE72      | Cyclin E72  | CCNE72      | Cyclin E72  |
| CCNE73      | Cyclin E73  | CCNE73      | Cyclin E73  |
| CCNE74      | Cyclin E74  | CCNE74      | Cyclin E74  |
| CCNE75      | Cyclin E75  | CCNE75      | Cyclin E75  |
| CCNE76      | Cyclin E76  | CCNE76      | Cyclin E76  |
| CCNE77      | Cyclin E77  | CCNE77      | Cyclin E77  |
| CCNE78      | Cyclin E78  | CCNE78      | Cyclin E78  |
| CCNE79      | Cyclin E79  | CCNE79      | Cyclin E79  |
| CCNE80      | Cyclin E80  | CCNE80      | Cyclin E80  |
| CCNE81      | Cyclin E81  | CCNE81      | Cyclin E81  |
| CCNE82      | Cyclin E82  | CCNE82      | Cyclin E82  |
| CCNE83      | Cyclin E83  | CCNE83      | Cyclin E83  |
| CCNE84      | Cyclin E84  | CCNE84      | Cyclin E84  |
| CCNE85      | Cyclin E85  | CCNE85      | Cyclin E85  |
| CCNE86      | Cyclin E86  | CCNE86      | Cyclin E86  |
| CCNE87      | Cyclin E87  | CCNE87      | Cyclin E87  |
| CCNE88      | Cyclin E88  | CCNE88      | Cyclin E88  |
| CCNE89      | Cyclin E89  | CCNE89      | Cyclin E89  |
| CCNE90      | Cyclin E90  | CCNE90      | Cyclin E90  |
| CCNE91      | Cyclin E91  | CCNE91      | Cyclin E91  |
| CCNE92      | Cyclin E92  | CCNE92      | Cyclin E92  |
| CCNE93      | Cyclin E93  | CCNE93      | Cyclin E93  |
| CCNE94      | Cyclin E94  | CCNE94      | Cyclin E94  |
| CCNE95      | Cyclin E95  | CCNE95      | Cyclin E95  |
| CCNE96      | Cyclin E96  | CCNE96      | Cyclin E96  |
| CCNE97      | Cyclin E97  | CCNE97      | Cyclin E97  |
| CCNE98      | Cyclin E98  | CCNE98      | Cyclin E98  |
| CCNE99      | Cyclin E99  | CCNE99      | Cyclin E99  |
| CCNE100     | Cyclin E100 | CCNE100     | Cyclin E100 |

## Supplementary Table 2: Cyclin D2 Differentially-expressed Genes

| Gene Symbol | Gene Name   | Gene Symbol | Gene Name   |
|-------------|-------------|-------------|-------------|
| CCND2       | Cyclin D2   | CCND2       | Cyclin D2   |
| CCND1       | Cyclin D1   | CCND1       | Cyclin D1   |
| CCND3       | Cyclin D3   | CCND3       | Cyclin D3   |
| CCND4       | Cyclin D4   | CCND4       | Cyclin D4   |
| CCND5       | Cyclin D5   | CCND5       | Cyclin D5   |
| CCND6       | Cyclin D6   | CCND6       | Cyclin D6   |
| CCND7       | Cyclin D7   | CCND7       | Cyclin D7   |
| CCND8       | Cyclin D8   | CCND8       | Cyclin D8   |
| CCND9       | Cyclin D9   | CCND9       | Cyclin D9   |
| CCND10      | Cyclin D10  | CCND10      | Cyclin D10  |
| CCND11      | Cyclin D11  | CCND11      | Cyclin D11  |
| CCND12      | Cyclin D12  | CCND12      | Cyclin D12  |
| CCND13      | Cyclin D13  | CCND13      | Cyclin D13  |
| CCND14      | Cyclin D14  | CCND14      | Cyclin D14  |
| CCND15      | Cyclin D15  | CCND15      | Cyclin D15  |
| CCND16      | Cyclin D16  | CCND16      | Cyclin D16  |
| CCND17      | Cyclin D17  | CCND17      | Cyclin D17  |
| CCND18      | Cyclin D18  | CCND18      | Cyclin D18  |
| CCND19      | Cyclin D19  | CCND19      | Cyclin D19  |
| CCND20      | Cyclin D20  | CCND20      | Cyclin D20  |
| CCND21      | Cyclin D21  | CCND21      | Cyclin D21  |
| CCND22      | Cyclin D22  | CCND22      | Cyclin D22  |
| CCND23      | Cyclin D23  | CCND23      | Cyclin D23  |
| CCND24      | Cyclin D24  | CCND24      | Cyclin D24  |
| CCND25      | Cyclin D25  | CCND25      | Cyclin D25  |
| CCND26      | Cyclin D26  | CCND26      | Cyclin D26  |
| CCND27      | Cyclin D27  | CCND27      | Cyclin D27  |
| CCND28      | Cyclin D28  | CCND28      | Cyclin D28  |
| CCND29      | Cyclin D29  | CCND29      | Cyclin D29  |
| CCND30      | Cyclin D30  | CCND30      | Cyclin D30  |
| CCND31      | Cyclin D31  | CCND31      | Cyclin D31  |
| CCND32      | Cyclin D32  | CCND32      | Cyclin D32  |
| CCND33      | Cyclin D33  | CCND33      | Cyclin D33  |
| CCND34      | Cyclin D34  | CCND34      | Cyclin D34  |
| CCND35      | Cyclin D35  | CCND35      | Cyclin D35  |
| CCND36      | Cyclin D36  | CCND36      | Cyclin D36  |
| CCND37      | Cyclin D37  | CCND37      | Cyclin D37  |
| CCND38      | Cyclin D38  | CCND38      | Cyclin D38  |
| CCND39      | Cyclin D39  | CCND39      | Cyclin D39  |
| CCND40      | Cyclin D40  | CCND40      | Cyclin D40  |
| CCND41      | Cyclin D41  | CCND41      | Cyclin D41  |
| CCND42      | Cyclin D42  | CCND42      | Cyclin D42  |
| CCND43      | Cyclin D43  | CCND43      | Cyclin D43  |
| CCND44      | Cyclin D44  | CCND44      | Cyclin D44  |
| CCND45      | Cyclin D45  | CCND45      | Cyclin D45  |
| CCND46      | Cyclin D46  | CCND46      | Cyclin D46  |
| CCND47      | Cyclin D47  | CCND47      | Cyclin D47  |
| CCND48      | Cyclin D48  | CCND48      | Cyclin D48  |
| CCND49      | Cyclin D49  | CCND49      | Cyclin D49  |
| CCND50      | Cyclin D50  | CCND50      | Cyclin D50  |
| CCND51      | Cyclin D51  | CCND51      | Cyclin D51  |
| CCND52      | Cyclin D52  | CCND52      | Cyclin D52  |
| CCND53      | Cyclin D53  | CCND53      | Cyclin D53  |
| CCND54      | Cyclin D54  | CCND54      | Cyclin D54  |
| CCND55      | Cyclin D55  | CCND55      | Cyclin D55  |
| CCND56      | Cyclin D56  | CCND56      | Cyclin D56  |
| CCND57      | Cyclin D57  | CCND57      | Cyclin D57  |
| CCND58      | Cyclin D58  | CCND58      | Cyclin D58  |
| CCND59      | Cyclin D59  | CCND59      | Cyclin D59  |
| CCND60      | Cyclin D60  | CCND60      | Cyclin D60  |
| CCND61      | Cyclin D61  | CCND61      | Cyclin D61  |
| CCND62      | Cyclin D62  | CCND62      | Cyclin D62  |
| CCND63      | Cyclin D63  | CCND63      | Cyclin D63  |
| CCND64      | Cyclin D64  | CCND64      | Cyclin D64  |
| CCND65      | Cyclin D65  | CCND65      | Cyclin D65  |
| CCND66      | Cyclin D66  | CCND66      | Cyclin D66  |
| CCND67      | Cyclin D67  | CCND67      | Cyclin D67  |
| CCND68      | Cyclin D68  | CCND68      | Cyclin D68  |
| CCND69      | Cyclin D69  | CCND69      | Cyclin D69  |
| CCND70      | Cyclin D70  | CCND70      | Cyclin D70  |
| CCND71      | Cyclin D71  | CCND71      | Cyclin D71  |
| CCND72      | Cyclin D72  | CCND72      | Cyclin D72  |
| CCND73      | Cyclin D73  | CCND73      | Cyclin D73  |
| CCND74      | Cyclin D74  | CCND74      | Cyclin D74  |
| CCND75      | Cyclin D75  | CCND75      | Cyclin D75  |
| CCND76      | Cyclin D76  | CCND76      | Cyclin D76  |
| CCND77      | Cyclin D77  | CCND77      | Cyclin D77  |
| CCND78      | Cyclin D78  | CCND78      | Cyclin D78  |
| CCND79      | Cyclin D79  | CCND79      | Cyclin D79  |
| CCND80      | Cyclin D80  | CCND80      | Cyclin D80  |
| CCND81      | Cyclin D81  | CCND81      | Cyclin D81  |
| CCND82      | Cyclin D82  | CCND82      | Cyclin D82  |
| CCND83      | Cyclin D83  | CCND83      | Cyclin D83  |
| CCND84      | Cyclin D84  | CCND84      | Cyclin D84  |
| CCND85      | Cyclin D85  | CCND85      | Cyclin D85  |
| CCND86      | Cyclin D86  | CCND86      | Cyclin D86  |
| CCND87      | Cyclin D87  | CCND87      | Cyclin D87  |
| CCND88      | Cyclin D88  | CCND88      | Cyclin D88  |
| CCND89      | Cyclin D89  | CCND89      | Cyclin D89  |
| CCND90      | Cyclin D90  | CCND90      | Cyclin D90  |
| CCND91      | Cyclin D91  | CCND91      | Cyclin D91  |
| CCND92      | Cyclin D92  | CCND92      | Cyclin D92  |
| CCND93      | Cyclin D93  | CCND93      | Cyclin D93  |
| CCND94      | Cyclin D94  | CCND94      | Cyclin D94  |
| CCND95      | Cyclin D95  | CCND95      | Cyclin D95  |
| CCND96      | Cyclin D96  | CCND96      | Cyclin D96  |
| CCND97      | Cyclin D97  | CCND97      | Cyclin D97  |
| CCND98      | Cyclin D98  | CCND98      | Cyclin D98  |
| CCND99      | Cyclin D99  | CCND99      | Cyclin D99  |
| CCND100     | Cyclin D100 | CCND100     | Cyclin D100 |



## Supplementary Table 2: Cyclin D2 Differentially-expressed Genes

| Gene Symbol | Gene Name   | Gene Symbol | Gene Name   |
|-------------|-------------|-------------|-------------|
| CCND2       | Cyclin D2   | CCND2       | Cyclin D2   |
| CCND1       | Cyclin D1   | CCND1       | Cyclin D1   |
| CCND3       | Cyclin D3   | CCND3       | Cyclin D3   |
| CCND4       | Cyclin D4   | CCND4       | Cyclin D4   |
| CCND5       | Cyclin D5   | CCND5       | Cyclin D5   |
| CCND6       | Cyclin D6   | CCND6       | Cyclin D6   |
| CCND7       | Cyclin D7   | CCND7       | Cyclin D7   |
| CCND8       | Cyclin D8   | CCND8       | Cyclin D8   |
| CCND9       | Cyclin D9   | CCND9       | Cyclin D9   |
| CCND10      | Cyclin D10  | CCND10      | Cyclin D10  |
| CCND11      | Cyclin D11  | CCND11      | Cyclin D11  |
| CCND12      | Cyclin D12  | CCND12      | Cyclin D12  |
| CCND13      | Cyclin D13  | CCND13      | Cyclin D13  |
| CCND14      | Cyclin D14  | CCND14      | Cyclin D14  |
| CCND15      | Cyclin D15  | CCND15      | Cyclin D15  |
| CCND16      | Cyclin D16  | CCND16      | Cyclin D16  |
| CCND17      | Cyclin D17  | CCND17      | Cyclin D17  |
| CCND18      | Cyclin D18  | CCND18      | Cyclin D18  |
| CCND19      | Cyclin D19  | CCND19      | Cyclin D19  |
| CCND20      | Cyclin D20  | CCND20      | Cyclin D20  |
| CCND21      | Cyclin D21  | CCND21      | Cyclin D21  |
| CCND22      | Cyclin D22  | CCND22      | Cyclin D22  |
| CCND23      | Cyclin D23  | CCND23      | Cyclin D23  |
| CCND24      | Cyclin D24  | CCND24      | Cyclin D24  |
| CCND25      | Cyclin D25  | CCND25      | Cyclin D25  |
| CCND26      | Cyclin D26  | CCND26      | Cyclin D26  |
| CCND27      | Cyclin D27  | CCND27      | Cyclin D27  |
| CCND28      | Cyclin D28  | CCND28      | Cyclin D28  |
| CCND29      | Cyclin D29  | CCND29      | Cyclin D29  |
| CCND30      | Cyclin D30  | CCND30      | Cyclin D30  |
| CCND31      | Cyclin D31  | CCND31      | Cyclin D31  |
| CCND32      | Cyclin D32  | CCND32      | Cyclin D32  |
| CCND33      | Cyclin D33  | CCND33      | Cyclin D33  |
| CCND34      | Cyclin D34  | CCND34      | Cyclin D34  |
| CCND35      | Cyclin D35  | CCND35      | Cyclin D35  |
| CCND36      | Cyclin D36  | CCND36      | Cyclin D36  |
| CCND37      | Cyclin D37  | CCND37      | Cyclin D37  |
| CCND38      | Cyclin D38  | CCND38      | Cyclin D38  |
| CCND39      | Cyclin D39  | CCND39      | Cyclin D39  |
| CCND40      | Cyclin D40  | CCND40      | Cyclin D40  |
| CCND41      | Cyclin D41  | CCND41      | Cyclin D41  |
| CCND42      | Cyclin D42  | CCND42      | Cyclin D42  |
| CCND43      | Cyclin D43  | CCND43      | Cyclin D43  |
| CCND44      | Cyclin D44  | CCND44      | Cyclin D44  |
| CCND45      | Cyclin D45  | CCND45      | Cyclin D45  |
| CCND46      | Cyclin D46  | CCND46      | Cyclin D46  |
| CCND47      | Cyclin D47  | CCND47      | Cyclin D47  |
| CCND48      | Cyclin D48  | CCND48      | Cyclin D48  |
| CCND49      | Cyclin D49  | CCND49      | Cyclin D49  |
| CCND50      | Cyclin D50  | CCND50      | Cyclin D50  |
| CCND51      | Cyclin D51  | CCND51      | Cyclin D51  |
| CCND52      | Cyclin D52  | CCND52      | Cyclin D52  |
| CCND53      | Cyclin D53  | CCND53      | Cyclin D53  |
| CCND54      | Cyclin D54  | CCND54      | Cyclin D54  |
| CCND55      | Cyclin D55  | CCND55      | Cyclin D55  |
| CCND56      | Cyclin D56  | CCND56      | Cyclin D56  |
| CCND57      | Cyclin D57  | CCND57      | Cyclin D57  |
| CCND58      | Cyclin D58  | CCND58      | Cyclin D58  |
| CCND59      | Cyclin D59  | CCND59      | Cyclin D59  |
| CCND60      | Cyclin D60  | CCND60      | Cyclin D60  |
| CCND61      | Cyclin D61  | CCND61      | Cyclin D61  |
| CCND62      | Cyclin D62  | CCND62      | Cyclin D62  |
| CCND63      | Cyclin D63  | CCND63      | Cyclin D63  |
| CCND64      | Cyclin D64  | CCND64      | Cyclin D64  |
| CCND65      | Cyclin D65  | CCND65      | Cyclin D65  |
| CCND66      | Cyclin D66  | CCND66      | Cyclin D66  |
| CCND67      | Cyclin D67  | CCND67      | Cyclin D67  |
| CCND68      | Cyclin D68  | CCND68      | Cyclin D68  |
| CCND69      | Cyclin D69  | CCND69      | Cyclin D69  |
| CCND70      | Cyclin D70  | CCND70      | Cyclin D70  |
| CCND71      | Cyclin D71  | CCND71      | Cyclin D71  |
| CCND72      | Cyclin D72  | CCND72      | Cyclin D72  |
| CCND73      | Cyclin D73  | CCND73      | Cyclin D73  |
| CCND74      | Cyclin D74  | CCND74      | Cyclin D74  |
| CCND75      | Cyclin D75  | CCND75      | Cyclin D75  |
| CCND76      | Cyclin D76  | CCND76      | Cyclin D76  |
| CCND77      | Cyclin D77  | CCND77      | Cyclin D77  |
| CCND78      | Cyclin D78  | CCND78      | Cyclin D78  |
| CCND79      | Cyclin D79  | CCND79      | Cyclin D79  |
| CCND80      | Cyclin D80  | CCND80      | Cyclin D80  |
| CCND81      | Cyclin D81  | CCND81      | Cyclin D81  |
| CCND82      | Cyclin D82  | CCND82      | Cyclin D82  |
| CCND83      | Cyclin D83  | CCND83      | Cyclin D83  |
| CCND84      | Cyclin D84  | CCND84      | Cyclin D84  |
| CCND85      | Cyclin D85  | CCND85      | Cyclin D85  |
| CCND86      | Cyclin D86  | CCND86      | Cyclin D86  |
| CCND87      | Cyclin D87  | CCND87      | Cyclin D87  |
| CCND88      | Cyclin D88  | CCND88      | Cyclin D88  |
| CCND89      | Cyclin D89  | CCND89      | Cyclin D89  |
| CCND90      | Cyclin D90  | CCND90      | Cyclin D90  |
| CCND91      | Cyclin D91  | CCND91      | Cyclin D91  |
| CCND92      | Cyclin D92  | CCND92      | Cyclin D92  |
| CCND93      | Cyclin D93  | CCND93      | Cyclin D93  |
| CCND94      | Cyclin D94  | CCND94      | Cyclin D94  |
| CCND95      | Cyclin D95  | CCND95      | Cyclin D95  |
| CCND96      | Cyclin D96  | CCND96      | Cyclin D96  |
| CCND97      | Cyclin D97  | CCND97      | Cyclin D97  |
| CCND98      | Cyclin D98  | CCND98      | Cyclin D98  |
| CCND99      | Cyclin D99  | CCND99      | Cyclin D99  |
| CCND100     | Cyclin D100 | CCND100     | Cyclin D100 |

## Supplementary Table 2: Cyclin D2 Differentially-expressed Genes

| Gene Symbol | Gene Name   | Gene Symbol | Gene Name   |
|-------------|-------------|-------------|-------------|
| CCND2       | Cyclin D2   | CCND2       | Cyclin D2   |
| CCND1       | Cyclin D1   | CCND1       | Cyclin D1   |
| CCNE1       | Cyclin E1   | CCNE1       | Cyclin E1   |
| CCNE2       | Cyclin E2   | CCNE2       | Cyclin E2   |
| CCNB1       | Cyclin B1   | CCNB1       | Cyclin B1   |
| CCNB2       | Cyclin B2   | CCNB2       | Cyclin B2   |
| CCNB3       | Cyclin B3   | CCNB3       | Cyclin B3   |
| CCNB4       | Cyclin B4   | CCNB4       | Cyclin B4   |
| CCNB5       | Cyclin B5   | CCNB5       | Cyclin B5   |
| CCNB6       | Cyclin B6   | CCNB6       | Cyclin B6   |
| CCNB7       | Cyclin B7   | CCNB7       | Cyclin B7   |
| CCNB8       | Cyclin B8   | CCNB8       | Cyclin B8   |
| CCNB9       | Cyclin B9   | CCNB9       | Cyclin B9   |
| CCNB10      | Cyclin B10  | CCNB10      | Cyclin B10  |
| CCNB11      | Cyclin B11  | CCNB11      | Cyclin B11  |
| CCNB12      | Cyclin B12  | CCNB12      | Cyclin B12  |
| CCNB13      | Cyclin B13  | CCNB13      | Cyclin B13  |
| CCNB14      | Cyclin B14  | CCNB14      | Cyclin B14  |
| CCNB15      | Cyclin B15  | CCNB15      | Cyclin B15  |
| CCNB16      | Cyclin B16  | CCNB16      | Cyclin B16  |
| CCNB17      | Cyclin B17  | CCNB17      | Cyclin B17  |
| CCNB18      | Cyclin B18  | CCNB18      | Cyclin B18  |
| CCNB19      | Cyclin B19  | CCNB19      | Cyclin B19  |
| CCNB20      | Cyclin B20  | CCNB20      | Cyclin B20  |
| CCNB21      | Cyclin B21  | CCNB21      | Cyclin B21  |
| CCNB22      | Cyclin B22  | CCNB22      | Cyclin B22  |
| CCNB23      | Cyclin B23  | CCNB23      | Cyclin B23  |
| CCNB24      | Cyclin B24  | CCNB24      | Cyclin B24  |
| CCNB25      | Cyclin B25  | CCNB25      | Cyclin B25  |
| CCNB26      | Cyclin B26  | CCNB26      | Cyclin B26  |
| CCNB27      | Cyclin B27  | CCNB27      | Cyclin B27  |
| CCNB28      | Cyclin B28  | CCNB28      | Cyclin B28  |
| CCNB29      | Cyclin B29  | CCNB29      | Cyclin B29  |
| CCNB30      | Cyclin B30  | CCNB30      | Cyclin B30  |
| CCNB31      | Cyclin B31  | CCNB31      | Cyclin B31  |
| CCNB32      | Cyclin B32  | CCNB32      | Cyclin B32  |
| CCNB33      | Cyclin B33  | CCNB33      | Cyclin B33  |
| CCNB34      | Cyclin B34  | CCNB34      | Cyclin B34  |
| CCNB35      | Cyclin B35  | CCNB35      | Cyclin B35  |
| CCNB36      | Cyclin B36  | CCNB36      | Cyclin B36  |
| CCNB37      | Cyclin B37  | CCNB37      | Cyclin B37  |
| CCNB38      | Cyclin B38  | CCNB38      | Cyclin B38  |
| CCNB39      | Cyclin B39  | CCNB39      | Cyclin B39  |
| CCNB40      | Cyclin B40  | CCNB40      | Cyclin B40  |
| CCNB41      | Cyclin B41  | CCNB41      | Cyclin B41  |
| CCNB42      | Cyclin B42  | CCNB42      | Cyclin B42  |
| CCNB43      | Cyclin B43  | CCNB43      | Cyclin B43  |
| CCNB44      | Cyclin B44  | CCNB44      | Cyclin B44  |
| CCNB45      | Cyclin B45  | CCNB45      | Cyclin B45  |
| CCNB46      | Cyclin B46  | CCNB46      | Cyclin B46  |
| CCNB47      | Cyclin B47  | CCNB47      | Cyclin B47  |
| CCNB48      | Cyclin B48  | CCNB48      | Cyclin B48  |
| CCNB49      | Cyclin B49  | CCNB49      | Cyclin B49  |
| CCNB50      | Cyclin B50  | CCNB50      | Cyclin B50  |
| CCNB51      | Cyclin B51  | CCNB51      | Cyclin B51  |
| CCNB52      | Cyclin B52  | CCNB52      | Cyclin B52  |
| CCNB53      | Cyclin B53  | CCNB53      | Cyclin B53  |
| CCNB54      | Cyclin B54  | CCNB54      | Cyclin B54  |
| CCNB55      | Cyclin B55  | CCNB55      | Cyclin B55  |
| CCNB56      | Cyclin B56  | CCNB56      | Cyclin B56  |
| CCNB57      | Cyclin B57  | CCNB57      | Cyclin B57  |
| CCNB58      | Cyclin B58  | CCNB58      | Cyclin B58  |
| CCNB59      | Cyclin B59  | CCNB59      | Cyclin B59  |
| CCNB60      | Cyclin B60  | CCNB60      | Cyclin B60  |
| CCNB61      | Cyclin B61  | CCNB61      | Cyclin B61  |
| CCNB62      | Cyclin B62  | CCNB62      | Cyclin B62  |
| CCNB63      | Cyclin B63  | CCNB63      | Cyclin B63  |
| CCNB64      | Cyclin B64  | CCNB64      | Cyclin B64  |
| CCNB65      | Cyclin B65  | CCNB65      | Cyclin B65  |
| CCNB66      | Cyclin B66  | CCNB66      | Cyclin B66  |
| CCNB67      | Cyclin B67  | CCNB67      | Cyclin B67  |
| CCNB68      | Cyclin B68  | CCNB68      | Cyclin B68  |
| CCNB69      | Cyclin B69  | CCNB69      | Cyclin B69  |
| CCNB70      | Cyclin B70  | CCNB70      | Cyclin B70  |
| CCNB71      | Cyclin B71  | CCNB71      | Cyclin B71  |
| CCNB72      | Cyclin B72  | CCNB72      | Cyclin B72  |
| CCNB73      | Cyclin B73  | CCNB73      | Cyclin B73  |
| CCNB74      | Cyclin B74  | CCNB74      | Cyclin B74  |
| CCNB75      | Cyclin B75  | CCNB75      | Cyclin B75  |
| CCNB76      | Cyclin B76  | CCNB76      | Cyclin B76  |
| CCNB77      | Cyclin B77  | CCNB77      | Cyclin B77  |
| CCNB78      | Cyclin B78  | CCNB78      | Cyclin B78  |
| CCNB79      | Cyclin B79  | CCNB79      | Cyclin B79  |
| CCNB80      | Cyclin B80  | CCNB80      | Cyclin B80  |
| CCNB81      | Cyclin B81  | CCNB81      | Cyclin B81  |
| CCNB82      | Cyclin B82  | CCNB82      | Cyclin B82  |
| CCNB83      | Cyclin B83  | CCNB83      | Cyclin B83  |
| CCNB84      | Cyclin B84  | CCNB84      | Cyclin B84  |
| CCNB85      | Cyclin B85  | CCNB85      | Cyclin B85  |
| CCNB86      | Cyclin B86  | CCNB86      | Cyclin B86  |
| CCNB87      | Cyclin B87  | CCNB87      | Cyclin B87  |
| CCNB88      | Cyclin B88  | CCNB88      | Cyclin B88  |
| CCNB89      | Cyclin B89  | CCNB89      | Cyclin B89  |
| CCNB90      | Cyclin B90  | CCNB90      | Cyclin B90  |
| CCNB91      | Cyclin B91  | CCNB91      | Cyclin B91  |
| CCNB92      | Cyclin B92  | CCNB92      | Cyclin B92  |
| CCNB93      | Cyclin B93  | CCNB93      | Cyclin B93  |
| CCNB94      | Cyclin B94  | CCNB94      | Cyclin B94  |
| CCNB95      | Cyclin B95  | CCNB95      | Cyclin B95  |
| CCNB96      | Cyclin B96  | CCNB96      | Cyclin B96  |
| CCNB97      | Cyclin B97  | CCNB97      | Cyclin B97  |
| CCNB98      | Cyclin B98  | CCNB98      | Cyclin B98  |
| CCNB99      | Cyclin B99  | CCNB99      | Cyclin B99  |
| CCNB100     | Cyclin B100 | CCNB100     | Cyclin B100 |



## Supplementary Table 2: Cyclin D2 Differentially-expressed Genes

| Gene Symbol | Gene Name   | Gene Symbol | Gene Name   |
|-------------|-------------|-------------|-------------|
| CCND2       | Cyclin D2   | CCND2       | Cyclin D2   |
| CCND1       | Cyclin D1   | CCND1       | Cyclin D1   |
| CCNE1       | Cyclin E1   | CCNE1       | Cyclin E1   |
| CCNE2       | Cyclin E2   | CCNE2       | Cyclin E2   |
| CCNE3       | Cyclin E3   | CCNE3       | Cyclin E3   |
| CCNE4       | Cyclin E4   | CCNE4       | Cyclin E4   |
| CCNE5       | Cyclin E5   | CCNE5       | Cyclin E5   |
| CCNE6       | Cyclin E6   | CCNE6       | Cyclin E6   |
| CCNE7       | Cyclin E7   | CCNE7       | Cyclin E7   |
| CCNE8       | Cyclin E8   | CCNE8       | Cyclin E8   |
| CCNE9       | Cyclin E9   | CCNE9       | Cyclin E9   |
| CCNE10      | Cyclin E10  | CCNE10      | Cyclin E10  |
| CCNE11      | Cyclin E11  | CCNE11      | Cyclin E11  |
| CCNE12      | Cyclin E12  | CCNE12      | Cyclin E12  |
| CCNE13      | Cyclin E13  | CCNE13      | Cyclin E13  |
| CCNE14      | Cyclin E14  | CCNE14      | Cyclin E14  |
| CCNE15      | Cyclin E15  | CCNE15      | Cyclin E15  |
| CCNE16      | Cyclin E16  | CCNE16      | Cyclin E16  |
| CCNE17      | Cyclin E17  | CCNE17      | Cyclin E17  |
| CCNE18      | Cyclin E18  | CCNE18      | Cyclin E18  |
| CCNE19      | Cyclin E19  | CCNE19      | Cyclin E19  |
| CCNE20      | Cyclin E20  | CCNE20      | Cyclin E20  |
| CCNE21      | Cyclin E21  | CCNE21      | Cyclin E21  |
| CCNE22      | Cyclin E22  | CCNE22      | Cyclin E22  |
| CCNE23      | Cyclin E23  | CCNE23      | Cyclin E23  |
| CCNE24      | Cyclin E24  | CCNE24      | Cyclin E24  |
| CCNE25      | Cyclin E25  | CCNE25      | Cyclin E25  |
| CCNE26      | Cyclin E26  | CCNE26      | Cyclin E26  |
| CCNE27      | Cyclin E27  | CCNE27      | Cyclin E27  |
| CCNE28      | Cyclin E28  | CCNE28      | Cyclin E28  |
| CCNE29      | Cyclin E29  | CCNE29      | Cyclin E29  |
| CCNE30      | Cyclin E30  | CCNE30      | Cyclin E30  |
| CCNE31      | Cyclin E31  | CCNE31      | Cyclin E31  |
| CCNE32      | Cyclin E32  | CCNE32      | Cyclin E32  |
| CCNE33      | Cyclin E33  | CCNE33      | Cyclin E33  |
| CCNE34      | Cyclin E34  | CCNE34      | Cyclin E34  |
| CCNE35      | Cyclin E35  | CCNE35      | Cyclin E35  |
| CCNE36      | Cyclin E36  | CCNE36      | Cyclin E36  |
| CCNE37      | Cyclin E37  | CCNE37      | Cyclin E37  |
| CCNE38      | Cyclin E38  | CCNE38      | Cyclin E38  |
| CCNE39      | Cyclin E39  | CCNE39      | Cyclin E39  |
| CCNE40      | Cyclin E40  | CCNE40      | Cyclin E40  |
| CCNE41      | Cyclin E41  | CCNE41      | Cyclin E41  |
| CCNE42      | Cyclin E42  | CCNE42      | Cyclin E42  |
| CCNE43      | Cyclin E43  | CCNE43      | Cyclin E43  |
| CCNE44      | Cyclin E44  | CCNE44      | Cyclin E44  |
| CCNE45      | Cyclin E45  | CCNE45      | Cyclin E45  |
| CCNE46      | Cyclin E46  | CCNE46      | Cyclin E46  |
| CCNE47      | Cyclin E47  | CCNE47      | Cyclin E47  |
| CCNE48      | Cyclin E48  | CCNE48      | Cyclin E48  |
| CCNE49      | Cyclin E49  | CCNE49      | Cyclin E49  |
| CCNE50      | Cyclin E50  | CCNE50      | Cyclin E50  |
| CCNE51      | Cyclin E51  | CCNE51      | Cyclin E51  |
| CCNE52      | Cyclin E52  | CCNE52      | Cyclin E52  |
| CCNE53      | Cyclin E53  | CCNE53      | Cyclin E53  |
| CCNE54      | Cyclin E54  | CCNE54      | Cyclin E54  |
| CCNE55      | Cyclin E55  | CCNE55      | Cyclin E55  |
| CCNE56      | Cyclin E56  | CCNE56      | Cyclin E56  |
| CCNE57      | Cyclin E57  | CCNE57      | Cyclin E57  |
| CCNE58      | Cyclin E58  | CCNE58      | Cyclin E58  |
| CCNE59      | Cyclin E59  | CCNE59      | Cyclin E59  |
| CCNE60      | Cyclin E60  | CCNE60      | Cyclin E60  |
| CCNE61      | Cyclin E61  | CCNE61      | Cyclin E61  |
| CCNE62      | Cyclin E62  | CCNE62      | Cyclin E62  |
| CCNE63      | Cyclin E63  | CCNE63      | Cyclin E63  |
| CCNE64      | Cyclin E64  | CCNE64      | Cyclin E64  |
| CCNE65      | Cyclin E65  | CCNE65      | Cyclin E65  |
| CCNE66      | Cyclin E66  | CCNE66      | Cyclin E66  |
| CCNE67      | Cyclin E67  | CCNE67      | Cyclin E67  |
| CCNE68      | Cyclin E68  | CCNE68      | Cyclin E68  |
| CCNE69      | Cyclin E69  | CCNE69      | Cyclin E69  |
| CCNE70      | Cyclin E70  | CCNE70      | Cyclin E70  |
| CCNE71      | Cyclin E71  | CCNE71      | Cyclin E71  |
| CCNE72      | Cyclin E72  | CCNE72      | Cyclin E72  |
| CCNE73      | Cyclin E73  | CCNE73      | Cyclin E73  |
| CCNE74      | Cyclin E74  | CCNE74      | Cyclin E74  |
| CCNE75      | Cyclin E75  | CCNE75      | Cyclin E75  |
| CCNE76      | Cyclin E76  | CCNE76      | Cyclin E76  |
| CCNE77      | Cyclin E77  | CCNE77      | Cyclin E77  |
| CCNE78      | Cyclin E78  | CCNE78      | Cyclin E78  |
| CCNE79      | Cyclin E79  | CCNE79      | Cyclin E79  |
| CCNE80      | Cyclin E80  | CCNE80      | Cyclin E80  |
| CCNE81      | Cyclin E81  | CCNE81      | Cyclin E81  |
| CCNE82      | Cyclin E82  | CCNE82      | Cyclin E82  |
| CCNE83      | Cyclin E83  | CCNE83      | Cyclin E83  |
| CCNE84      | Cyclin E84  | CCNE84      | Cyclin E84  |
| CCNE85      | Cyclin E85  | CCNE85      | Cyclin E85  |
| CCNE86      | Cyclin E86  | CCNE86      | Cyclin E86  |
| CCNE87      | Cyclin E87  | CCNE87      | Cyclin E87  |
| CCNE88      | Cyclin E88  | CCNE88      | Cyclin E88  |
| CCNE89      | Cyclin E89  | CCNE89      | Cyclin E89  |
| CCNE90      | Cyclin E90  | CCNE90      | Cyclin E90  |
| CCNE91      | Cyclin E91  | CCNE91      | Cyclin E91  |
| CCNE92      | Cyclin E92  | CCNE92      | Cyclin E92  |
| CCNE93      | Cyclin E93  | CCNE93      | Cyclin E93  |
| CCNE94      | Cyclin E94  | CCNE94      | Cyclin E94  |
| CCNE95      | Cyclin E95  | CCNE95      | Cyclin E95  |
| CCNE96      | Cyclin E96  | CCNE96      | Cyclin E96  |
| CCNE97      | Cyclin E97  | CCNE97      | Cyclin E97  |
| CCNE98      | Cyclin E98  | CCNE98      | Cyclin E98  |
| CCNE99      | Cyclin E99  | CCNE99      | Cyclin E99  |
| CCNE100     | Cyclin E100 | CCNE100     | Cyclin E100 |

## Supplementary Table 2: Cyclin D2 Differentially-expressed Genes

| Gene Symbol | Gene Name   | Gene Symbol | Gene Name   |
|-------------|-------------|-------------|-------------|
| CCND2       | Cyclin D2   | CCND2       | Cyclin D2   |
| CCND1       | Cyclin D1   | CCND1       | Cyclin D1   |
| CCND3       | Cyclin D3   | CCND3       | Cyclin D3   |
| CCND4       | Cyclin D4   | CCND4       | Cyclin D4   |
| CCND5       | Cyclin D5   | CCND5       | Cyclin D5   |
| CCND6       | Cyclin D6   | CCND6       | Cyclin D6   |
| CCND7       | Cyclin D7   | CCND7       | Cyclin D7   |
| CCND8       | Cyclin D8   | CCND8       | Cyclin D8   |
| CCND9       | Cyclin D9   | CCND9       | Cyclin D9   |
| CCND10      | Cyclin D10  | CCND10      | Cyclin D10  |
| CCND11      | Cyclin D11  | CCND11      | Cyclin D11  |
| CCND12      | Cyclin D12  | CCND12      | Cyclin D12  |
| CCND13      | Cyclin D13  | CCND13      | Cyclin D13  |
| CCND14      | Cyclin D14  | CCND14      | Cyclin D14  |
| CCND15      | Cyclin D15  | CCND15      | Cyclin D15  |
| CCND16      | Cyclin D16  | CCND16      | Cyclin D16  |
| CCND17      | Cyclin D17  | CCND17      | Cyclin D17  |
| CCND18      | Cyclin D18  | CCND18      | Cyclin D18  |
| CCND19      | Cyclin D19  | CCND19      | Cyclin D19  |
| CCND20      | Cyclin D20  | CCND20      | Cyclin D20  |
| CCND21      | Cyclin D21  | CCND21      | Cyclin D21  |
| CCND22      | Cyclin D22  | CCND22      | Cyclin D22  |
| CCND23      | Cyclin D23  | CCND23      | Cyclin D23  |
| CCND24      | Cyclin D24  | CCND24      | Cyclin D24  |
| CCND25      | Cyclin D25  | CCND25      | Cyclin D25  |
| CCND26      | Cyclin D26  | CCND26      | Cyclin D26  |
| CCND27      | Cyclin D27  | CCND27      | Cyclin D27  |
| CCND28      | Cyclin D28  | CCND28      | Cyclin D28  |
| CCND29      | Cyclin D29  | CCND29      | Cyclin D29  |
| CCND30      | Cyclin D30  | CCND30      | Cyclin D30  |
| CCND31      | Cyclin D31  | CCND31      | Cyclin D31  |
| CCND32      | Cyclin D32  | CCND32      | Cyclin D32  |
| CCND33      | Cyclin D33  | CCND33      | Cyclin D33  |
| CCND34      | Cyclin D34  | CCND34      | Cyclin D34  |
| CCND35      | Cyclin D35  | CCND35      | Cyclin D35  |
| CCND36      | Cyclin D36  | CCND36      | Cyclin D36  |
| CCND37      | Cyclin D37  | CCND37      | Cyclin D37  |
| CCND38      | Cyclin D38  | CCND38      | Cyclin D38  |
| CCND39      | Cyclin D39  | CCND39      | Cyclin D39  |
| CCND40      | Cyclin D40  | CCND40      | Cyclin D40  |
| CCND41      | Cyclin D41  | CCND41      | Cyclin D41  |
| CCND42      | Cyclin D42  | CCND42      | Cyclin D42  |
| CCND43      | Cyclin D43  | CCND43      | Cyclin D43  |
| CCND44      | Cyclin D44  | CCND44      | Cyclin D44  |
| CCND45      | Cyclin D45  | CCND45      | Cyclin D45  |
| CCND46      | Cyclin D46  | CCND46      | Cyclin D46  |
| CCND47      | Cyclin D47  | CCND47      | Cyclin D47  |
| CCND48      | Cyclin D48  | CCND48      | Cyclin D48  |
| CCND49      | Cyclin D49  | CCND49      | Cyclin D49  |
| CCND50      | Cyclin D50  | CCND50      | Cyclin D50  |
| CCND51      | Cyclin D51  | CCND51      | Cyclin D51  |
| CCND52      | Cyclin D52  | CCND52      | Cyclin D52  |
| CCND53      | Cyclin D53  | CCND53      | Cyclin D53  |
| CCND54      | Cyclin D54  | CCND54      | Cyclin D54  |
| CCND55      | Cyclin D55  | CCND55      | Cyclin D55  |
| CCND56      | Cyclin D56  | CCND56      | Cyclin D56  |
| CCND57      | Cyclin D57  | CCND57      | Cyclin D57  |
| CCND58      | Cyclin D58  | CCND58      | Cyclin D58  |
| CCND59      | Cyclin D59  | CCND59      | Cyclin D59  |
| CCND60      | Cyclin D60  | CCND60      | Cyclin D60  |
| CCND61      | Cyclin D61  | CCND61      | Cyclin D61  |
| CCND62      | Cyclin D62  | CCND62      | Cyclin D62  |
| CCND63      | Cyclin D63  | CCND63      | Cyclin D63  |
| CCND64      | Cyclin D64  | CCND64      | Cyclin D64  |
| CCND65      | Cyclin D65  | CCND65      | Cyclin D65  |
| CCND66      | Cyclin D66  | CCND66      | Cyclin D66  |
| CCND67      | Cyclin D67  | CCND67      | Cyclin D67  |
| CCND68      | Cyclin D68  | CCND68      | Cyclin D68  |
| CCND69      | Cyclin D69  | CCND69      | Cyclin D69  |
| CCND70      | Cyclin D70  | CCND70      | Cyclin D70  |
| CCND71      | Cyclin D71  | CCND71      | Cyclin D71  |
| CCND72      | Cyclin D72  | CCND72      | Cyclin D72  |
| CCND73      | Cyclin D73  | CCND73      | Cyclin D73  |
| CCND74      | Cyclin D74  | CCND74      | Cyclin D74  |
| CCND75      | Cyclin D75  | CCND75      | Cyclin D75  |
| CCND76      | Cyclin D76  | CCND76      | Cyclin D76  |
| CCND77      | Cyclin D77  | CCND77      | Cyclin D77  |
| CCND78      | Cyclin D78  | CCND78      | Cyclin D78  |
| CCND79      | Cyclin D79  | CCND79      | Cyclin D79  |
| CCND80      | Cyclin D80  | CCND80      | Cyclin D80  |
| CCND81      | Cyclin D81  | CCND81      | Cyclin D81  |
| CCND82      | Cyclin D82  | CCND82      | Cyclin D82  |
| CCND83      | Cyclin D83  | CCND83      | Cyclin D83  |
| CCND84      | Cyclin D84  | CCND84      | Cyclin D84  |
| CCND85      | Cyclin D85  | CCND85      | Cyclin D85  |
| CCND86      | Cyclin D86  | CCND86      | Cyclin D86  |
| CCND87      | Cyclin D87  | CCND87      | Cyclin D87  |
| CCND88      | Cyclin D88  | CCND88      | Cyclin D88  |
| CCND89      | Cyclin D89  | CCND89      | Cyclin D89  |
| CCND90      | Cyclin D90  | CCND90      | Cyclin D90  |
| CCND91      | Cyclin D91  | CCND91      | Cyclin D91  |
| CCND92      | Cyclin D92  | CCND92      | Cyclin D92  |
| CCND93      | Cyclin D93  | CCND93      | Cyclin D93  |
| CCND94      | Cyclin D94  | CCND94      | Cyclin D94  |
| CCND95      | Cyclin D95  | CCND95      | Cyclin D95  |
| CCND96      | Cyclin D96  | CCND96      | Cyclin D96  |
| CCND97      | Cyclin D97  | CCND97      | Cyclin D97  |
| CCND98      | Cyclin D98  | CCND98      | Cyclin D98  |
| CCND99      | Cyclin D99  | CCND99      | Cyclin D99  |
| CCND100     | Cyclin D100 | CCND100     | Cyclin D100 |

## Supplementary Table 2: Cyclin D2 Differentially-expressed Genes

| Gene Symbol | Gene Name   | Gene Symbol | Gene Name   |
|-------------|-------------|-------------|-------------|
| CCND2       | Cyclin D2   | CCND2       | Cyclin D2   |
| CCND1       | Cyclin D1   | CCND1       | Cyclin D1   |
| CCNE1       | Cyclin E1   | CCNE1       | Cyclin E1   |
| CCNE2       | Cyclin E2   | CCNE2       | Cyclin E2   |
| CCNE3       | Cyclin E3   | CCNE3       | Cyclin E3   |
| CCNE4       | Cyclin E4   | CCNE4       | Cyclin E4   |
| CCNE5       | Cyclin E5   | CCNE5       | Cyclin E5   |
| CCNE6       | Cyclin E6   | CCNE6       | Cyclin E6   |
| CCNE7       | Cyclin E7   | CCNE7       | Cyclin E7   |
| CCNE8       | Cyclin E8   | CCNE8       | Cyclin E8   |
| CCNE9       | Cyclin E9   | CCNE9       | Cyclin E9   |
| CCNE10      | Cyclin E10  | CCNE10      | Cyclin E10  |
| CCNE11      | Cyclin E11  | CCNE11      | Cyclin E11  |
| CCNE12      | Cyclin E12  | CCNE12      | Cyclin E12  |
| CCNE13      | Cyclin E13  | CCNE13      | Cyclin E13  |
| CCNE14      | Cyclin E14  | CCNE14      | Cyclin E14  |
| CCNE15      | Cyclin E15  | CCNE15      | Cyclin E15  |
| CCNE16      | Cyclin E16  | CCNE16      | Cyclin E16  |
| CCNE17      | Cyclin E17  | CCNE17      | Cyclin E17  |
| CCNE18      | Cyclin E18  | CCNE18      | Cyclin E18  |
| CCNE19      | Cyclin E19  | CCNE19      | Cyclin E19  |
| CCNE20      | Cyclin E20  | CCNE20      | Cyclin E20  |
| CCNE21      | Cyclin E21  | CCNE21      | Cyclin E21  |
| CCNE22      | Cyclin E22  | CCNE22      | Cyclin E22  |
| CCNE23      | Cyclin E23  | CCNE23      | Cyclin E23  |
| CCNE24      | Cyclin E24  | CCNE24      | Cyclin E24  |
| CCNE25      | Cyclin E25  | CCNE25      | Cyclin E25  |
| CCNE26      | Cyclin E26  | CCNE26      | Cyclin E26  |
| CCNE27      | Cyclin E27  | CCNE27      | Cyclin E27  |
| CCNE28      | Cyclin E28  | CCNE28      | Cyclin E28  |
| CCNE29      | Cyclin E29  | CCNE29      | Cyclin E29  |
| CCNE30      | Cyclin E30  | CCNE30      | Cyclin E30  |
| CCNE31      | Cyclin E31  | CCNE31      | Cyclin E31  |
| CCNE32      | Cyclin E32  | CCNE32      | Cyclin E32  |
| CCNE33      | Cyclin E33  | CCNE33      | Cyclin E33  |
| CCNE34      | Cyclin E34  | CCNE34      | Cyclin E34  |
| CCNE35      | Cyclin E35  | CCNE35      | Cyclin E35  |
| CCNE36      | Cyclin E36  | CCNE36      | Cyclin E36  |
| CCNE37      | Cyclin E37  | CCNE37      | Cyclin E37  |
| CCNE38      | Cyclin E38  | CCNE38      | Cyclin E38  |
| CCNE39      | Cyclin E39  | CCNE39      | Cyclin E39  |
| CCNE40      | Cyclin E40  | CCNE40      | Cyclin E40  |
| CCNE41      | Cyclin E41  | CCNE41      | Cyclin E41  |
| CCNE42      | Cyclin E42  | CCNE42      | Cyclin E42  |
| CCNE43      | Cyclin E43  | CCNE43      | Cyclin E43  |
| CCNE44      | Cyclin E44  | CCNE44      | Cyclin E44  |
| CCNE45      | Cyclin E45  | CCNE45      | Cyclin E45  |
| CCNE46      | Cyclin E46  | CCNE46      | Cyclin E46  |
| CCNE47      | Cyclin E47  | CCNE47      | Cyclin E47  |
| CCNE48      | Cyclin E48  | CCNE48      | Cyclin E48  |
| CCNE49      | Cyclin E49  | CCNE49      | Cyclin E49  |
| CCNE50      | Cyclin E50  | CCNE50      | Cyclin E50  |
| CCNE51      | Cyclin E51  | CCNE51      | Cyclin E51  |
| CCNE52      | Cyclin E52  | CCNE52      | Cyclin E52  |
| CCNE53      | Cyclin E53  | CCNE53      | Cyclin E53  |
| CCNE54      | Cyclin E54  | CCNE54      | Cyclin E54  |
| CCNE55      | Cyclin E55  | CCNE55      | Cyclin E55  |
| CCNE56      | Cyclin E56  | CCNE56      | Cyclin E56  |
| CCNE57      | Cyclin E57  | CCNE57      | Cyclin E57  |
| CCNE58      | Cyclin E58  | CCNE58      | Cyclin E58  |
| CCNE59      | Cyclin E59  | CCNE59      | Cyclin E59  |
| CCNE60      | Cyclin E60  | CCNE60      | Cyclin E60  |
| CCNE61      | Cyclin E61  | CCNE61      | Cyclin E61  |
| CCNE62      | Cyclin E62  | CCNE62      | Cyclin E62  |
| CCNE63      | Cyclin E63  | CCNE63      | Cyclin E63  |
| CCNE64      | Cyclin E64  | CCNE64      | Cyclin E64  |
| CCNE65      | Cyclin E65  | CCNE65      | Cyclin E65  |
| CCNE66      | Cyclin E66  | CCNE66      | Cyclin E66  |
| CCNE67      | Cyclin E67  | CCNE67      | Cyclin E67  |
| CCNE68      | Cyclin E68  | CCNE68      | Cyclin E68  |
| CCNE69      | Cyclin E69  | CCNE69      | Cyclin E69  |
| CCNE70      | Cyclin E70  | CCNE70      | Cyclin E70  |
| CCNE71      | Cyclin E71  | CCNE71      | Cyclin E71  |
| CCNE72      | Cyclin E72  | CCNE72      | Cyclin E72  |
| CCNE73      | Cyclin E73  | CCNE73      | Cyclin E73  |
| CCNE74      | Cyclin E74  | CCNE74      | Cyclin E74  |
| CCNE75      | Cyclin E75  | CCNE75      | Cyclin E75  |
| CCNE76      | Cyclin E76  | CCNE76      | Cyclin E76  |
| CCNE77      | Cyclin E77  | CCNE77      | Cyclin E77  |
| CCNE78      | Cyclin E78  | CCNE78      | Cyclin E78  |
| CCNE79      | Cyclin E79  | CCNE79      | Cyclin E79  |
| CCNE80      | Cyclin E80  | CCNE80      | Cyclin E80  |
| CCNE81      | Cyclin E81  | CCNE81      | Cyclin E81  |
| CCNE82      | Cyclin E82  | CCNE82      | Cyclin E82  |
| CCNE83      | Cyclin E83  | CCNE83      | Cyclin E83  |
| CCNE84      | Cyclin E84  | CCNE84      | Cyclin E84  |
| CCNE85      | Cyclin E85  | CCNE85      | Cyclin E85  |
| CCNE86      | Cyclin E86  | CCNE86      | Cyclin E86  |
| CCNE87      | Cyclin E87  | CCNE87      | Cyclin E87  |
| CCNE88      | Cyclin E88  | CCNE88      | Cyclin E88  |
| CCNE89      | Cyclin E89  | CCNE89      | Cyclin E89  |
| CCNE90      | Cyclin E90  | CCNE90      | Cyclin E90  |
| CCNE91      | Cyclin E91  | CCNE91      | Cyclin E91  |
| CCNE92      | Cyclin E92  | CCNE92      | Cyclin E92  |
| CCNE93      | Cyclin E93  | CCNE93      | Cyclin E93  |
| CCNE94      | Cyclin E94  | CCNE94      | Cyclin E94  |
| CCNE95      | Cyclin E95  | CCNE95      | Cyclin E95  |
| CCNE96      | Cyclin E96  | CCNE96      | Cyclin E96  |
| CCNE97      | Cyclin E97  | CCNE97      | Cyclin E97  |
| CCNE98      | Cyclin E98  | CCNE98      | Cyclin E98  |
| CCNE99      | Cyclin E99  | CCNE99      | Cyclin E99  |
| CCNE100     | Cyclin E100 | CCNE100     | Cyclin E100 |

## Supplementary Table 2: Cyclin D2 Differentially-expressed Genes

| Gene Symbol | Gene Name   | Gene Symbol | Gene Name   |
|-------------|-------------|-------------|-------------|
| CCND2       | Cyclin D2   | CCND2       | Cyclin D2   |
| CCND1       | Cyclin D1   | CCND1       | Cyclin D1   |
| CCNE1       | Cyclin E1   | CCNE1       | Cyclin E1   |
| CCNE2       | Cyclin E2   | CCNE2       | Cyclin E2   |
| CCNE3       | Cyclin E3   | CCNE3       | Cyclin E3   |
| CCNE4       | Cyclin E4   | CCNE4       | Cyclin E4   |
| CCNE5       | Cyclin E5   | CCNE5       | Cyclin E5   |
| CCNE6       | Cyclin E6   | CCNE6       | Cyclin E6   |
| CCNE7       | Cyclin E7   | CCNE7       | Cyclin E7   |
| CCNE8       | Cyclin E8   | CCNE8       | Cyclin E8   |
| CCNE9       | Cyclin E9   | CCNE9       | Cyclin E9   |
| CCNE10      | Cyclin E10  | CCNE10      | Cyclin E10  |
| CCNE11      | Cyclin E11  | CCNE11      | Cyclin E11  |
| CCNE12      | Cyclin E12  | CCNE12      | Cyclin E12  |
| CCNE13      | Cyclin E13  | CCNE13      | Cyclin E13  |
| CCNE14      | Cyclin E14  | CCNE14      | Cyclin E14  |
| CCNE15      | Cyclin E15  | CCNE15      | Cyclin E15  |
| CCNE16      | Cyclin E16  | CCNE16      | Cyclin E16  |
| CCNE17      | Cyclin E17  | CCNE17      | Cyclin E17  |
| CCNE18      | Cyclin E18  | CCNE18      | Cyclin E18  |
| CCNE19      | Cyclin E19  | CCNE19      | Cyclin E19  |
| CCNE20      | Cyclin E20  | CCNE20      | Cyclin E20  |
| CCNE21      | Cyclin E21  | CCNE21      | Cyclin E21  |
| CCNE22      | Cyclin E22  | CCNE22      | Cyclin E22  |
| CCNE23      | Cyclin E23  | CCNE23      | Cyclin E23  |
| CCNE24      | Cyclin E24  | CCNE24      | Cyclin E24  |
| CCNE25      | Cyclin E25  | CCNE25      | Cyclin E25  |
| CCNE26      | Cyclin E26  | CCNE26      | Cyclin E26  |
| CCNE27      | Cyclin E27  | CCNE27      | Cyclin E27  |
| CCNE28      | Cyclin E28  | CCNE28      | Cyclin E28  |
| CCNE29      | Cyclin E29  | CCNE29      | Cyclin E29  |
| CCNE30      | Cyclin E30  | CCNE30      | Cyclin E30  |
| CCNE31      | Cyclin E31  | CCNE31      | Cyclin E31  |
| CCNE32      | Cyclin E32  | CCNE32      | Cyclin E32  |
| CCNE33      | Cyclin E33  | CCNE33      | Cyclin E33  |
| CCNE34      | Cyclin E34  | CCNE34      | Cyclin E34  |
| CCNE35      | Cyclin E35  | CCNE35      | Cyclin E35  |
| CCNE36      | Cyclin E36  | CCNE36      | Cyclin E36  |
| CCNE37      | Cyclin E37  | CCNE37      | Cyclin E37  |
| CCNE38      | Cyclin E38  | CCNE38      | Cyclin E38  |
| CCNE39      | Cyclin E39  | CCNE39      | Cyclin E39  |
| CCNE40      | Cyclin E40  | CCNE40      | Cyclin E40  |
| CCNE41      | Cyclin E41  | CCNE41      | Cyclin E41  |
| CCNE42      | Cyclin E42  | CCNE42      | Cyclin E42  |
| CCNE43      | Cyclin E43  | CCNE43      | Cyclin E43  |
| CCNE44      | Cyclin E44  | CCNE44      | Cyclin E44  |
| CCNE45      | Cyclin E45  | CCNE45      | Cyclin E45  |
| CCNE46      | Cyclin E46  | CCNE46      | Cyclin E46  |
| CCNE47      | Cyclin E47  | CCNE47      | Cyclin E47  |
| CCNE48      | Cyclin E48  | CCNE48      | Cyclin E48  |
| CCNE49      | Cyclin E49  | CCNE49      | Cyclin E49  |
| CCNE50      | Cyclin E50  | CCNE50      | Cyclin E50  |
| CCNE51      | Cyclin E51  | CCNE51      | Cyclin E51  |
| CCNE52      | Cyclin E52  | CCNE52      | Cyclin E52  |
| CCNE53      | Cyclin E53  | CCNE53      | Cyclin E53  |
| CCNE54      | Cyclin E54  | CCNE54      | Cyclin E54  |
| CCNE55      | Cyclin E55  | CCNE55      | Cyclin E55  |
| CCNE56      | Cyclin E56  | CCNE56      | Cyclin E56  |
| CCNE57      | Cyclin E57  | CCNE57      | Cyclin E57  |
| CCNE58      | Cyclin E58  | CCNE58      | Cyclin E58  |
| CCNE59      | Cyclin E59  | CCNE59      | Cyclin E59  |
| CCNE60      | Cyclin E60  | CCNE60      | Cyclin E60  |
| CCNE61      | Cyclin E61  | CCNE61      | Cyclin E61  |
| CCNE62      | Cyclin E62  | CCNE62      | Cyclin E62  |
| CCNE63      | Cyclin E63  | CCNE63      | Cyclin E63  |
| CCNE64      | Cyclin E64  | CCNE64      | Cyclin E64  |
| CCNE65      | Cyclin E65  | CCNE65      | Cyclin E65  |
| CCNE66      | Cyclin E66  | CCNE66      | Cyclin E66  |
| CCNE67      | Cyclin E67  | CCNE67      | Cyclin E67  |
| CCNE68      | Cyclin E68  | CCNE68      | Cyclin E68  |
| CCNE69      | Cyclin E69  | CCNE69      | Cyclin E69  |
| CCNE70      | Cyclin E70  | CCNE70      | Cyclin E70  |
| CCNE71      | Cyclin E71  | CCNE71      | Cyclin E71  |
| CCNE72      | Cyclin E72  | CCNE72      | Cyclin E72  |
| CCNE73      | Cyclin E73  | CCNE73      | Cyclin E73  |
| CCNE74      | Cyclin E74  | CCNE74      | Cyclin E74  |
| CCNE75      | Cyclin E75  | CCNE75      | Cyclin E75  |
| CCNE76      | Cyclin E76  | CCNE76      | Cyclin E76  |
| CCNE77      | Cyclin E77  | CCNE77      | Cyclin E77  |
| CCNE78      | Cyclin E78  | CCNE78      | Cyclin E78  |
| CCNE79      | Cyclin E79  | CCNE79      | Cyclin E79  |
| CCNE80      | Cyclin E80  | CCNE80      | Cyclin E80  |
| CCNE81      | Cyclin E81  | CCNE81      | Cyclin E81  |
| CCNE82      | Cyclin E82  | CCNE82      | Cyclin E82  |
| CCNE83      | Cyclin E83  | CCNE83      | Cyclin E83  |
| CCNE84      | Cyclin E84  | CCNE84      | Cyclin E84  |
| CCNE85      | Cyclin E85  | CCNE85      | Cyclin E85  |
| CCNE86      | Cyclin E86  | CCNE86      | Cyclin E86  |
| CCNE87      | Cyclin E87  | CCNE87      | Cyclin E87  |
| CCNE88      | Cyclin E88  | CCNE88      | Cyclin E88  |
| CCNE89      | Cyclin E89  | CCNE89      | Cyclin E89  |
| CCNE90      | Cyclin E90  | CCNE90      | Cyclin E90  |
| CCNE91      | Cyclin E91  | CCNE91      | Cyclin E91  |
| CCNE92      | Cyclin E92  | CCNE92      | Cyclin E92  |
| CCNE93      | Cyclin E93  | CCNE93      | Cyclin E93  |
| CCNE94      | Cyclin E94  | CCNE94      | Cyclin E94  |
| CCNE95      | Cyclin E95  | CCNE95      | Cyclin E95  |
| CCNE96      | Cyclin E96  | CCNE96      | Cyclin E96  |
| CCNE97      | Cyclin E97  | CCNE97      | Cyclin E97  |
| CCNE98      | Cyclin E98  | CCNE98      | Cyclin E98  |
| CCNE99      | Cyclin E99  | CCNE99      | Cyclin E99  |
| CCNE100     | Cyclin E100 | CCNE100     | Cyclin E100 |
